# Supplementary material for: Common and rare variants associating with serum levels of creatine kinase and lactate dehydrogenase
Source: PubMed Central journal article supplement (PMC4742860; doi:10.1038/ncomms10572), 2016-02-03
Supplement: ncomms10572-s1.pdf [file ncomms10572-s1.pdf]

## Supplementary Figures

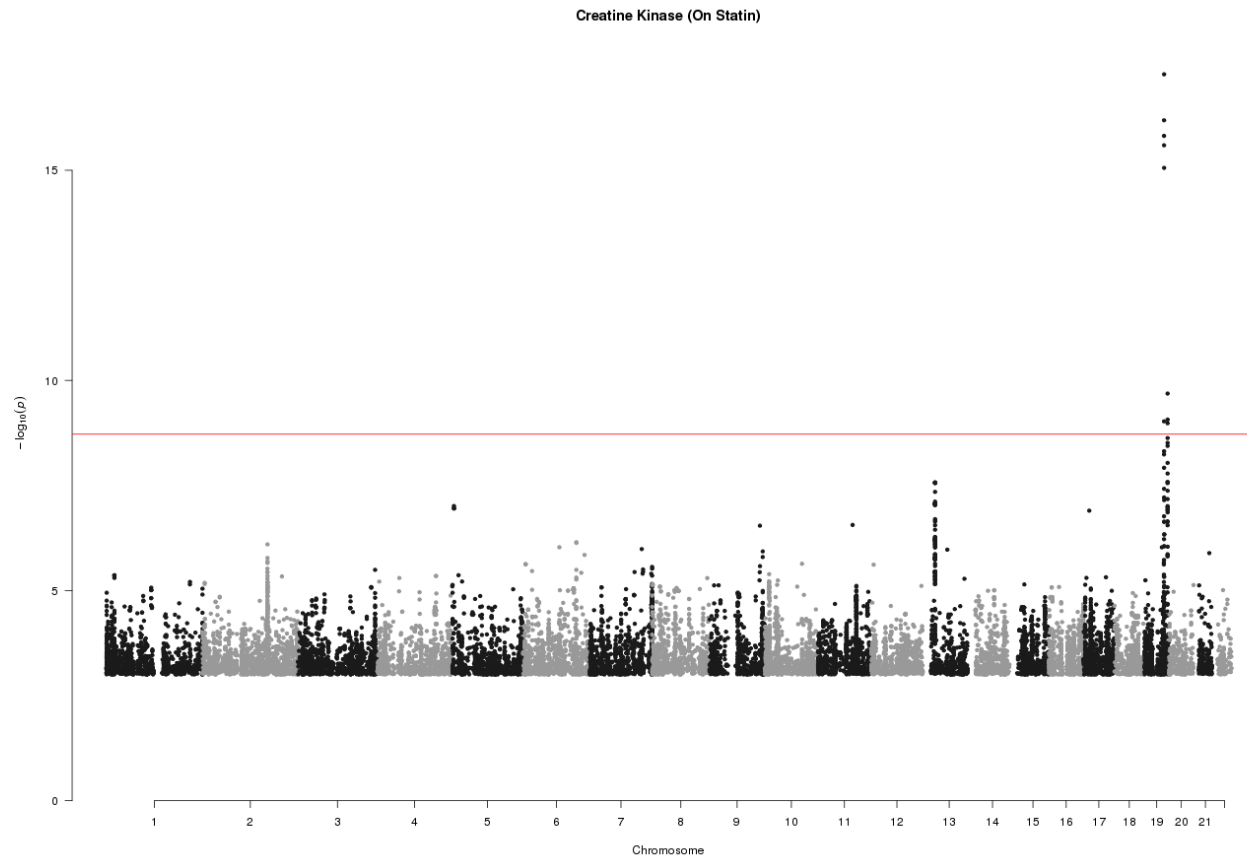

**Supplementary Figure 1:** Manhattan plot showing the signals influencing serum creatine kinase (CK) levels in the Icelandic population during times of statin use. Variants are plotted by chromosomal position (x-axis) and  $-\log_{10}$  P-values (y-axis). P-values above  $1 \times 10^{-25}$  are represented. Two loci (CKM and LILRB5) harbor variants with p-values below this cutoff. The red line indicates the threshold for genome-wide significance, determined by the number of tests performed ( $P = 0.05/28.3 \text{ million} = 1.8 \times 10^{-9}$ ).

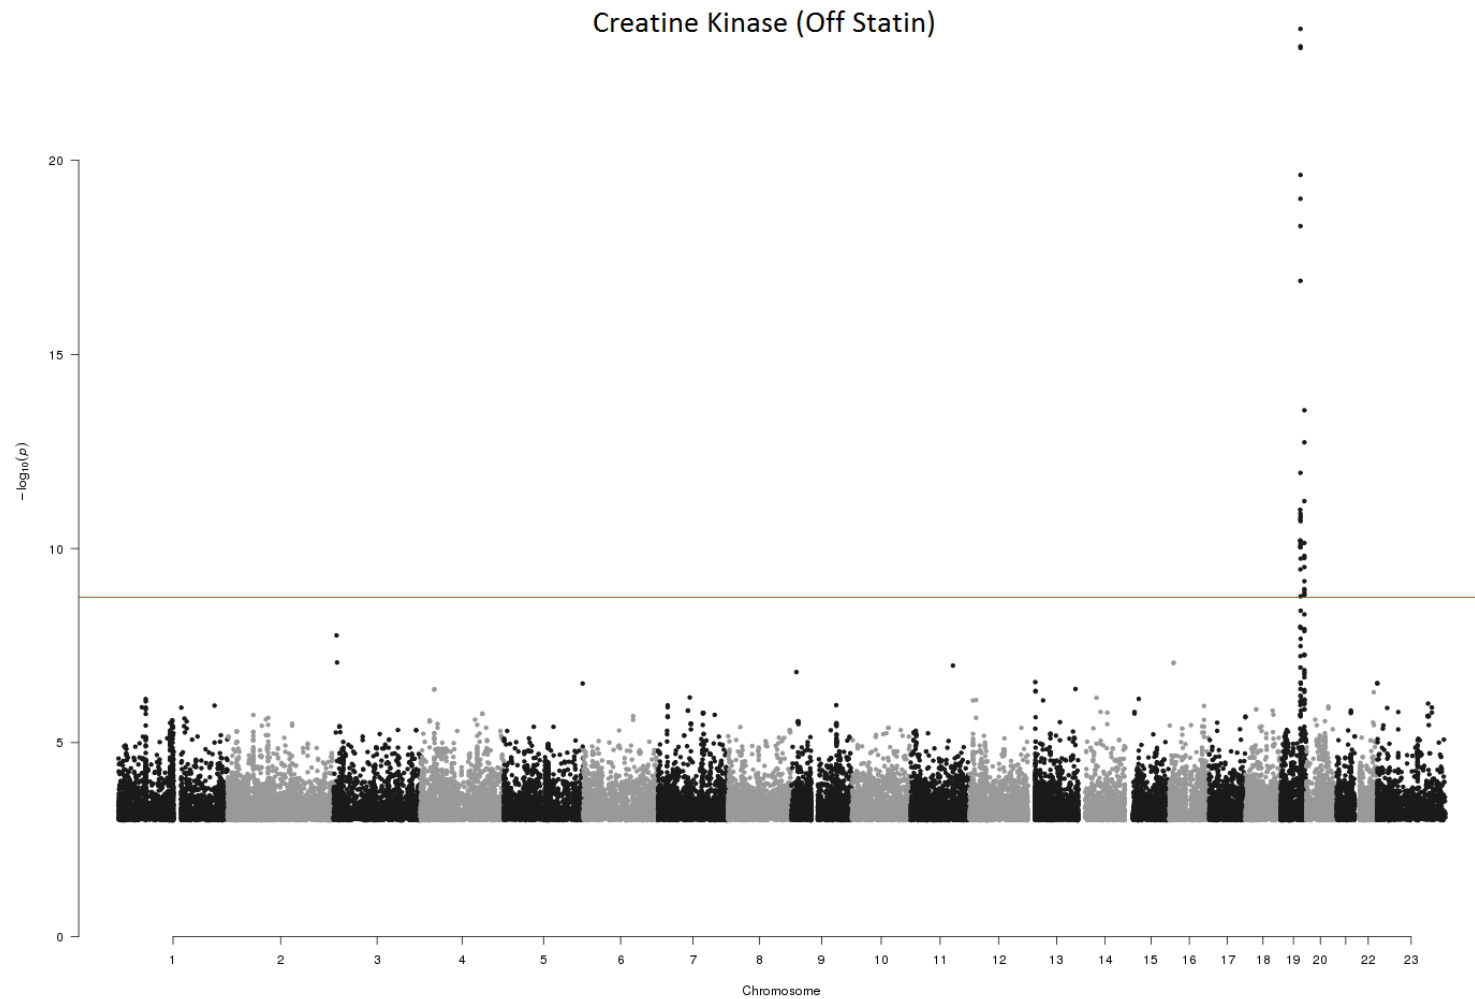

**Supplementary Figure 2:** Manhattan plot showing the signals influencing serum creatine kinase (CK) levels in the Icelandic population outside of times of statin use. Variants are plotted by chromosomal position (x-axis) and  $-\log_{10}$  P-values (y-axis). P-values above  $1 \times 10^{-25}$  are represented. Two loci (CKM and LILRB5) harbor variants with p-values below this cutoff. The red line indicates the threshold for genome-wide significance, determined by the number of tests performed ( $P = 0.05/28.3 \text{ million} = 1.8 \times 10^{-9}$ ).

### Lactate Dehydrogenase (On Statin)

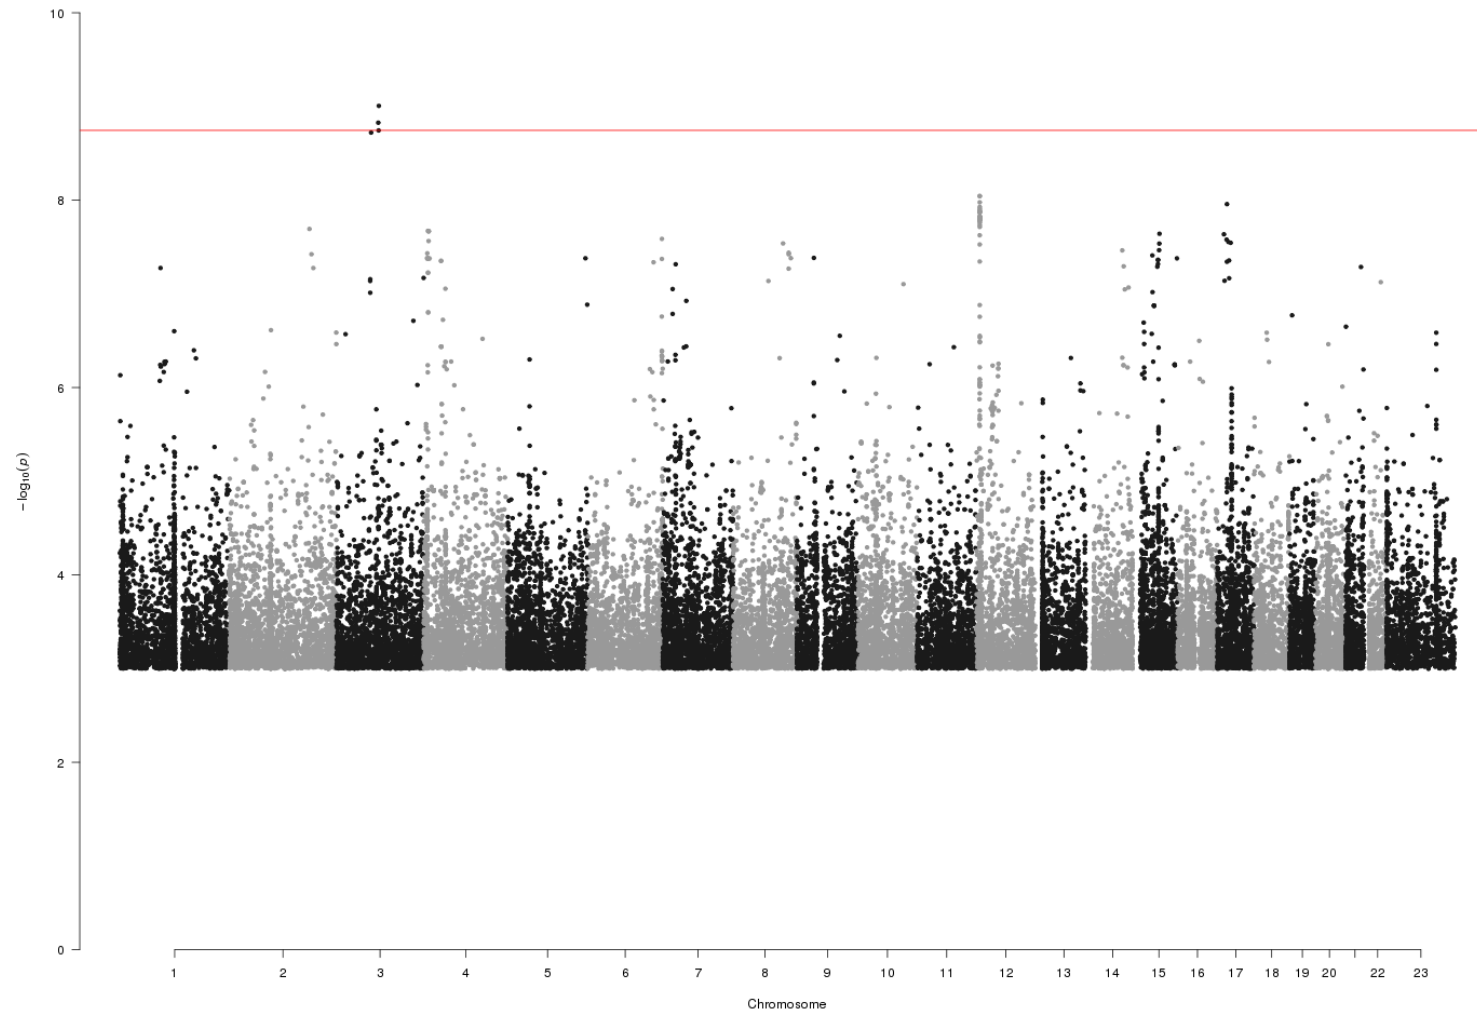

**Supplementary Figure 3:** Manhattan plot showing the signals influencing serum lactate dehydrogenase (LDH) levels in the Icelandic population during times of statin use. Variants are plotted by chromosomal position (x-axis) and  $-\log_{10}$  P-values (y-axis). P-values above  $1 \times 10^{-25}$  are represented. One locus (CD163L1) harbors variants with p-values below this cutoff. The red line indicates the threshold for genome-wide significance, determined by the number of tests performed ( $P = 0.05/28.3 \text{ million} = 1.8 \times 10^{-9}$ ).

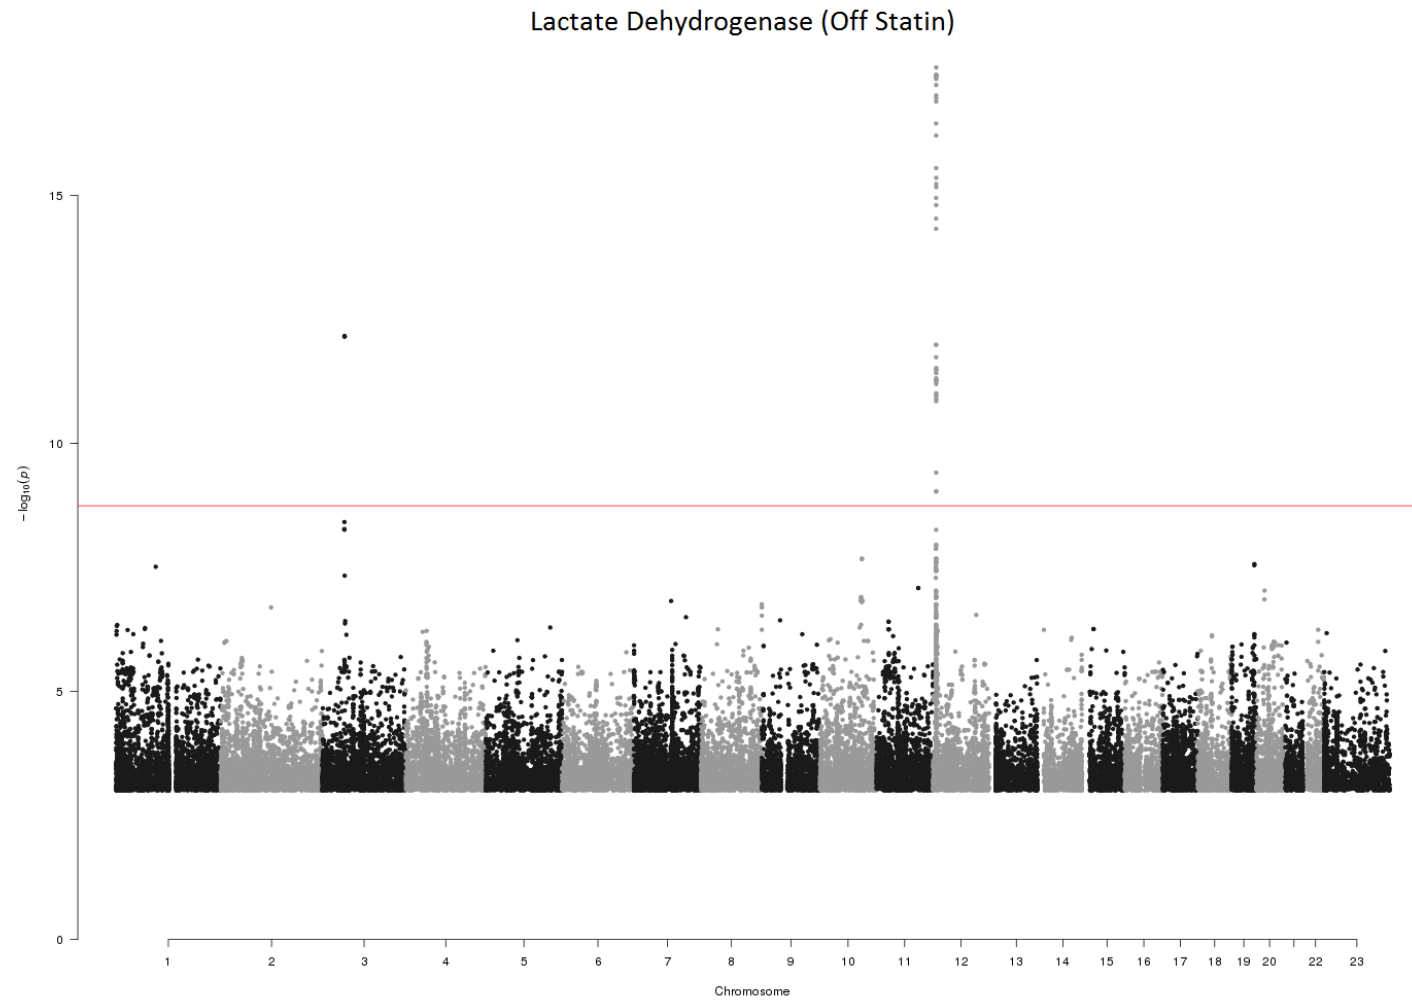

**Supplementary Figure 4:** Manhattan plot showing the signals influencing serum lactate dehydrogenase (LDH) levels in the Icelandic population during times of statin use. Variants are plotted by chromosomal position (x-axis) and  $-\log_{10}$  P-values (y-axis). P-values above  $1 \times 10^{-25}$  are represented. One locus (CD163L1) harbors variants with p-values below this cutoff. The red line indicates the threshold for genome-wide significance, determined by the number of tests performed ( $P = 0.05/28.3 \text{ million} = 1.8 \times 10^{-9}$ ).

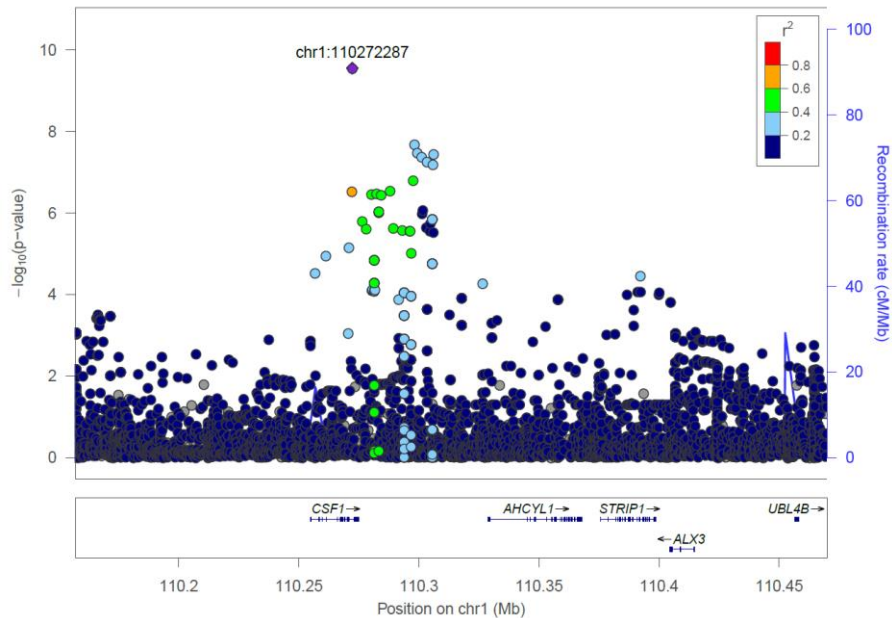

**Supplementary Figure 5:** Locus plot depicting variants, arranged by chromosomal position (x-axis) within the *CSF1* locus associating with serum LDH levels. The leading variant rs333947 is labelled and shown in purple, other variants are coloured according to correlation ( $r^2$ ) with the leading marker (legend at top-right).  $-\log_{10} P$ -values are shown along the left y-axis and correspond to the variants depicted in the plot. The right y-axis shows calculated recombination rates at the chromosomal location, plotted as a solid blue line.

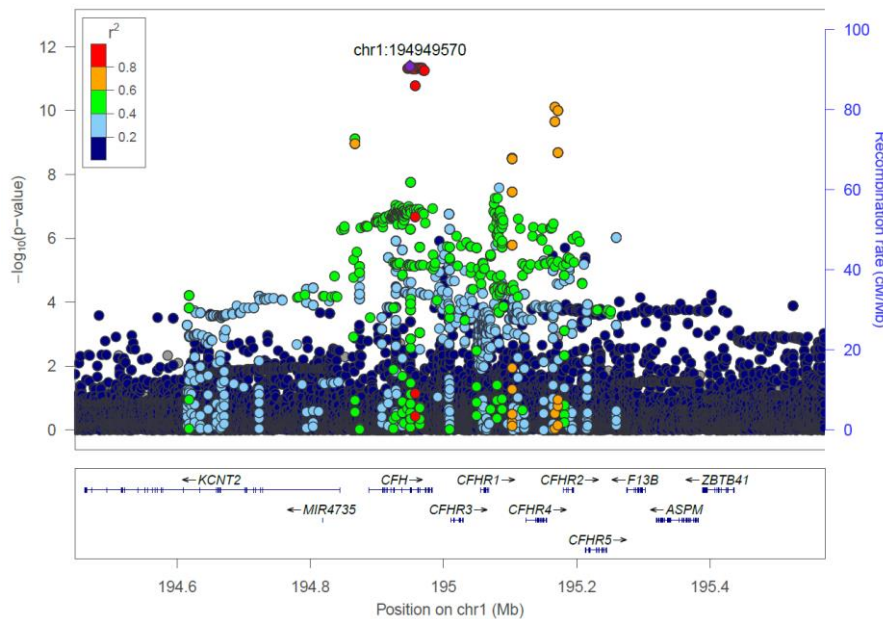

**Supplementary Figure 6:** Locus plot depicting variants, arranged by chromosomal position (x-axis) within the *CFH* locus associating with serum LDH levels. The leading variant rs2274700 is labelled and shown in purple, other variants are coloured according to correlation ( $r^2$ ) with the leading marker (legend at top-right).  $-\log_{10} P$ -values are shown along the left y-axis and correspond to the variants depicted in the plot. The right y-axis shows calculated recombination rates at the chromosomal location, plotted as a solid blue line.

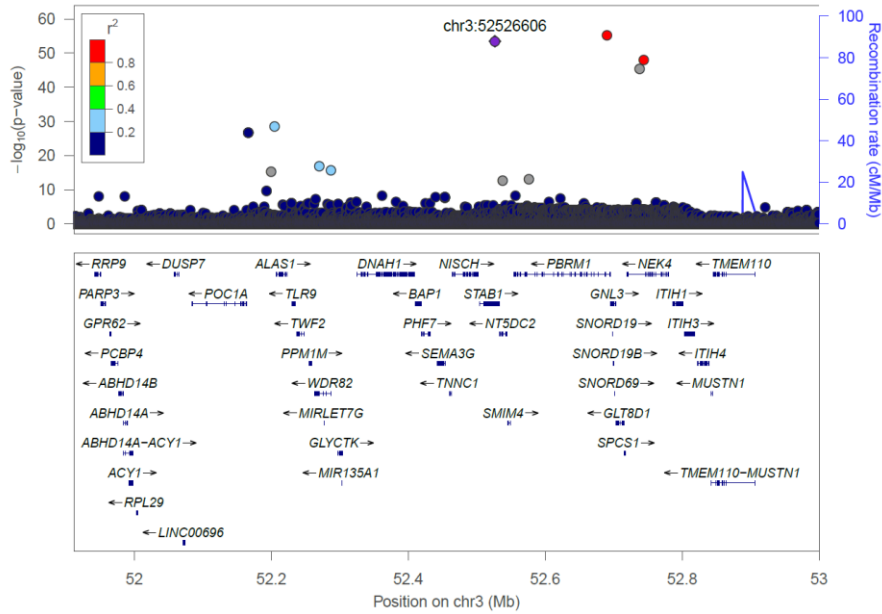

**Supplementary Figure 7:** Locus plot depicting variants, arranged by chromosomal position (x-axis) within the *STAB1* locus associating with serum LDH levels. The leading variant rs150956780 is labelled and shown in purple, other variants are coloured according to correlation ( $r^2$ ) with the leading marker (legend at top-right).  $-\log_{10}$  P-values are shown along the left y-axis and correspond to the variants depicted in the plot. The right y-axis shows calculated recombination rates at the chromosomal location, plotted as a solid blue line.

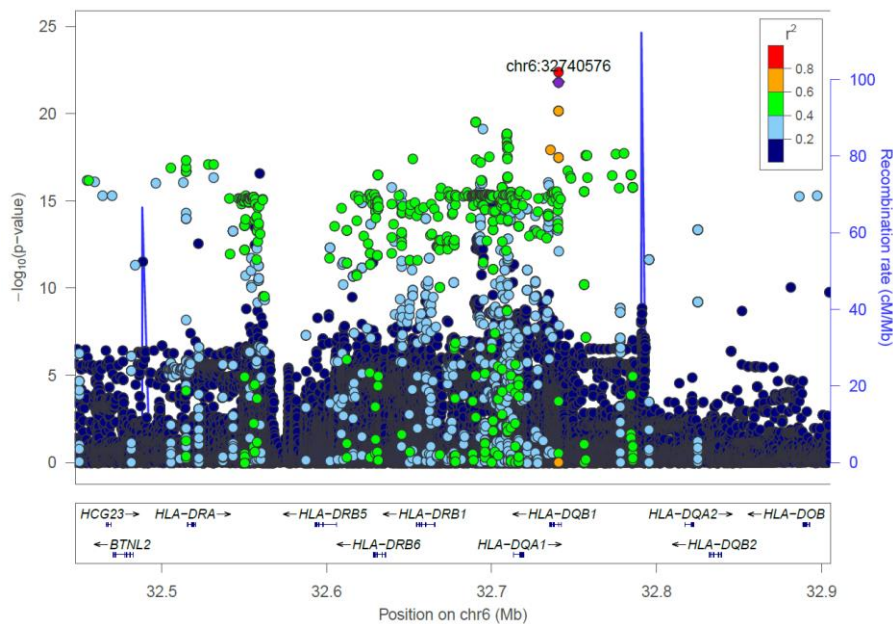

**Supplementary Figure 8:** Locus plot depicting variants, arranged by chromosomal position (x-axis) within the *HLA-DQB1* locus associating with serum LDH levels. The leading variant rs17412833 is labelled and shown in purple, other variants are coloured according to correlation ( $r^2$ ) with the leading marker (legend at top-right).  $-\log_{10}$  P-values are shown along the left y-axis and correspond to the variants depicted in the plot. The right y-axis shows calculated recombination rates at the chromosomal location, plotted as a solid blue line.

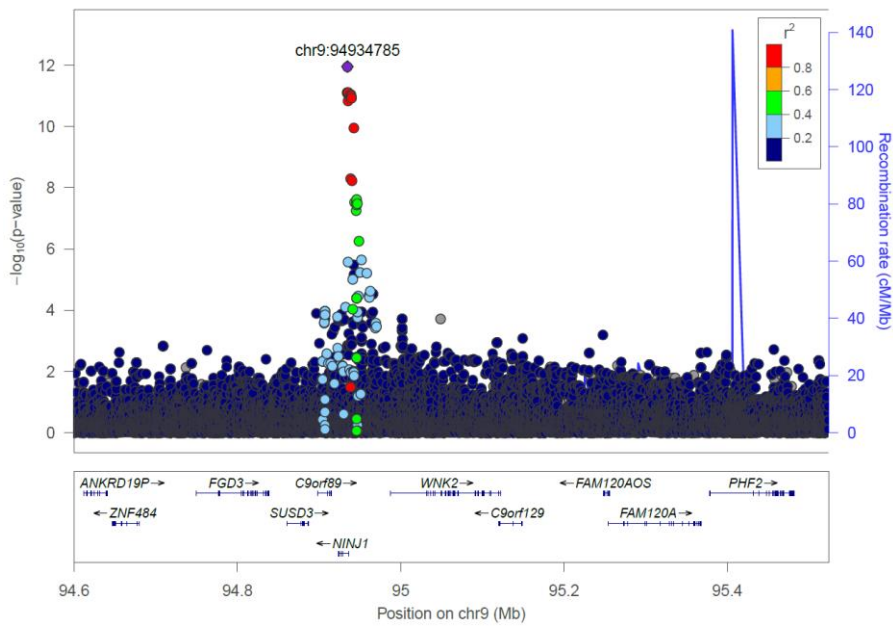

**Supplementary Figure 9:** Locus plot depicting variants, arranged by chromosomal position (x-axis) within the *NINJ1* locus associating with serum LDH levels. The leading variant rs12342201 is labelled and shown in purple, other variants are coloured according to correlation ( $r^2$ ) with the leading marker (legend at top-right).  $-\log_{10}$  P-values are shown along the left y-axis and correspond to the variants depicted in the plot. The right y-axis shows calculated recombination rates at the chromosomal location, plotted as a solid blue line.

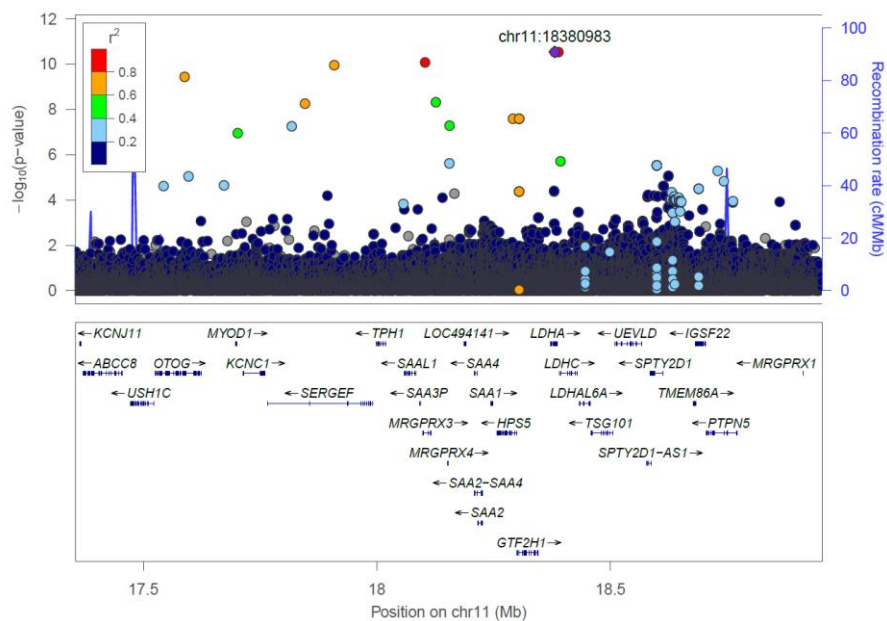

**Supplementary Figure 10:** Locus plot depicting variants, arranged by chromosomal position (x-axis) within the *LDHA* locus associating with serum LDH levels. The leading variant rs116841148 is labelled and shown in purple, other variants are coloured according to correlation ( $r^2$ ) with the leading marker (legend at top-right).  $-\log_{10}$  P-values are shown along the left y-axis and correspond to the variants depicted in the plot. The right y-axis shows calculated recombination rates at the chromosomal location, plotted as a solid blue line.



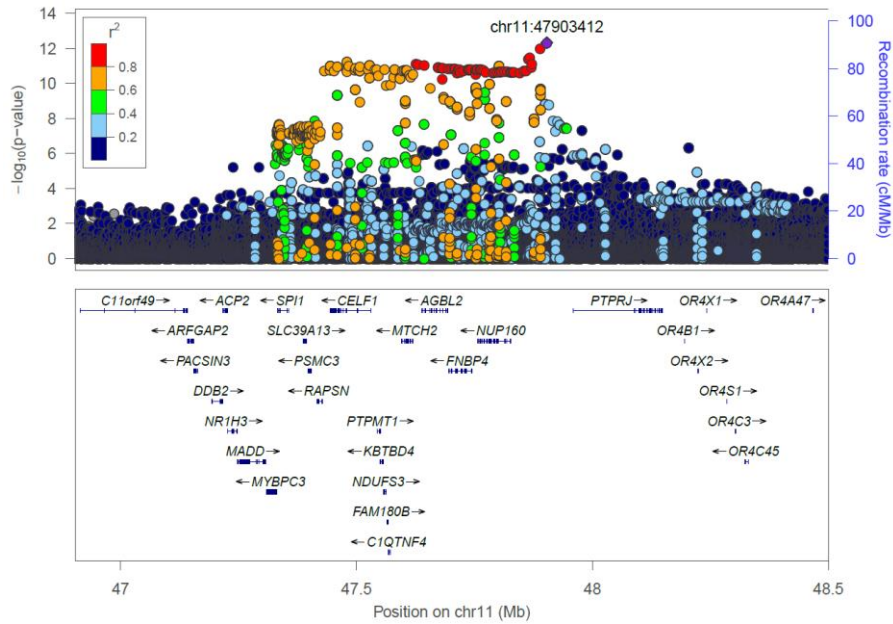

**Supplementary Figure 11:** Locus plot depicting variants, arranged by chromosomal position (x-axis) at 11p11.2 associating with serum LDH levels. The leading variant chr11:47903412:S is labelled and shown in purple, other variants are coloured according to correlation ( $r^2$ ) with the leading marker (legend at top-right).  $-\log_{10}$  P-values are shown along the left y-axis and correspond to the variants depicted in the plot. The right y-axis shows calculated recombination rates at the chromosomal location, plotted as a solid blue line.

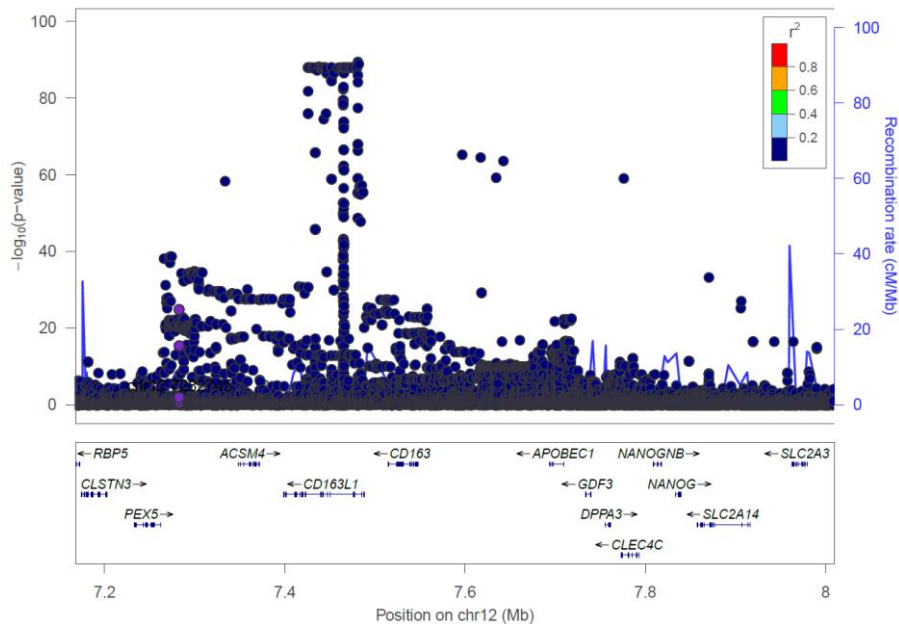

**Supplementary Figure 12:** Locus plot depicting variants, arranged by chromosomal position (x-axis) at the CD163/CD163L1 locus associating with serum LDH levels. The leading variant chr12:7282745:0:TA is labelled and shown in purple, other variants are coloured according to correlation ( $r^2$ ) with the leading marker (legend at top-right).  $-\log_{10}$  P-values are shown along the left y-axis and correspond to the variants depicted in the plot. The right y-axis shows calculated recombination rates at the chromosomal location, plotted as a solid blue line.



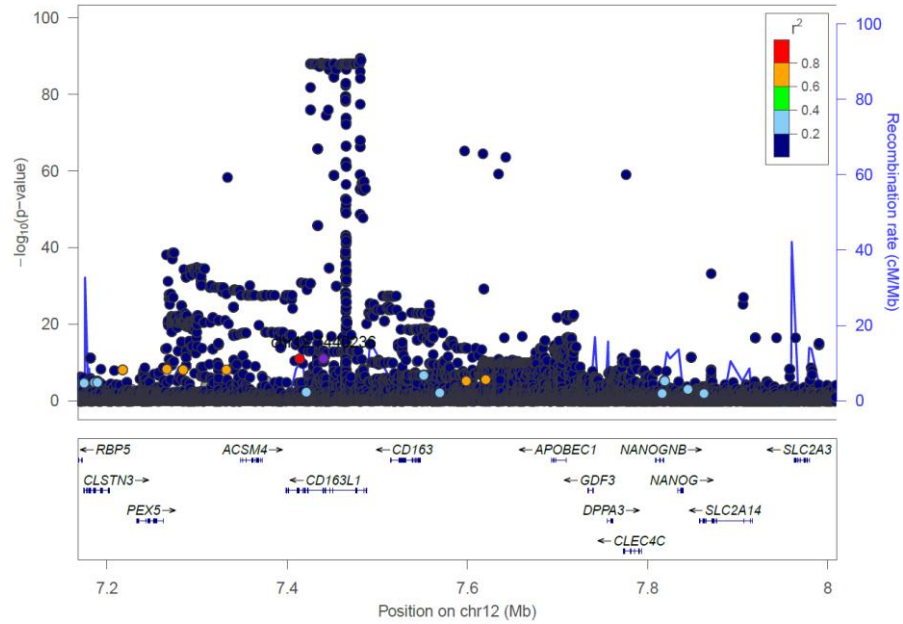

**Supplementary Figure 13:** Locus plot depicting variants, arranged by chromosomal position (x-axis) at the CD163/CD163L1 locus associating with serum LDH levels. The leading variant rs145411783 is labelled and shown in purple, other variants are coloured according to correlation ( $r^2$ ) with the leading marker (legend at top-right).  $-\log_{10}$  P-values are shown along the left y-axis and correspond to the variants depicted in the plot. The right y-axis shows calculated recombination rates at the chromosomal location, plotted as a solid blue line.

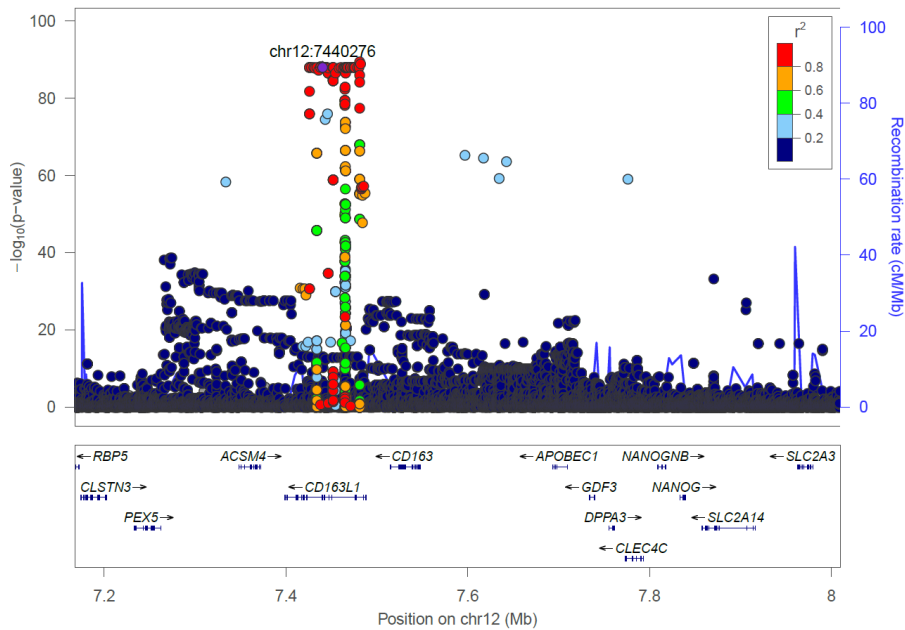

**Supplementary Figure 14:** Locus plot depicting variants, arranged by chromosomal position (x-axis) at the CD163/CD163L1 locus associating with serum LDH levels. The leading variant rs4072797 is labelled and shown in purple, other variants are coloured according to correlation ( $r^2$ ) with the leading marker (legend at top-right).  $-\log_{10}$  P-values are shown along the left y-axis and correspond to the variants depicted in the plot. The right y-axis shows calculated recombination rates at the chromosomal location, plotted as a solid blue line.

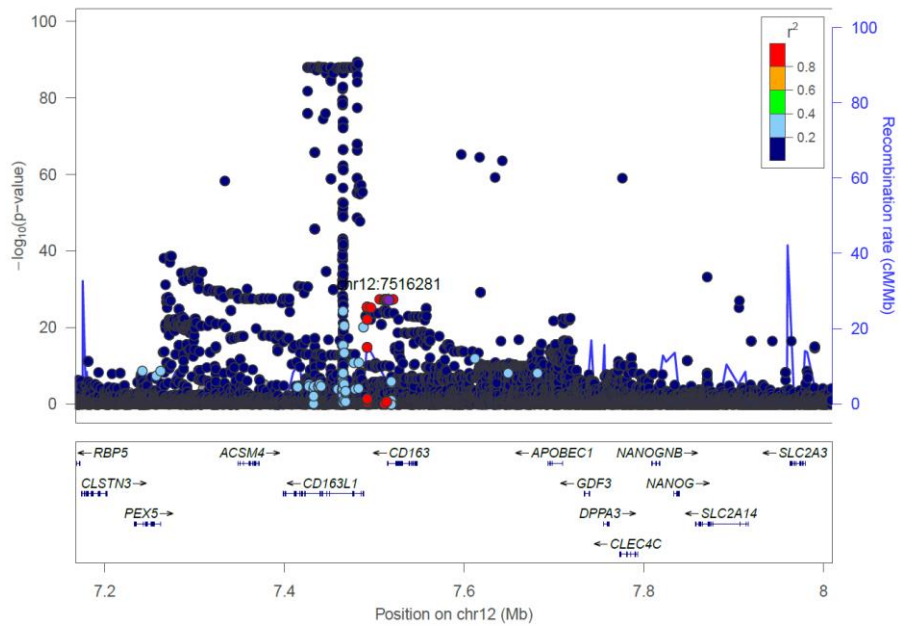

**Supplementary Figure 15:** Locus plot depicting variants, arranged by chromosomal position (x-axis) at the CD163/CD163L1 locus associating with serum LDH levels. The leading variant rs117692263 is labelled and shown in purple, other variants are coloured according to correlation ( $r^2$ ) with the leading marker (legend at top-right).  $-\log_{10}$  P-values are shown along the left y-axis and correspond to the variants depicted in the plot. The right y-axis shows calculated recombination rates at the chromosomal location, plotted as a solid blue line.

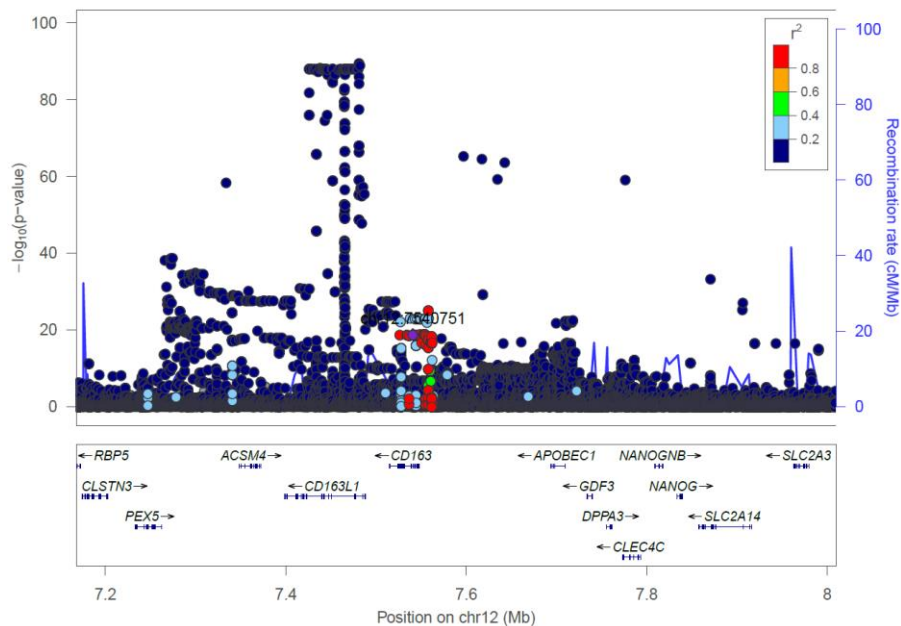

**Supplementary Figure 16:** Locus plot depicting variants, arranged by chromosomal position (x-axis) at the CD163/CD163L1 locus associating with serum LDH levels. The leading variant rs4883263 is labelled and shown in purple, other variants are coloured according to correlation ( $r^2$ ) with the leading marker (legend at top-right).  $-\log_{10}$  P-values are shown along the left y-axis and correspond to the variants depicted in the plot. The right y-axis shows calculated recombination rates at the chromosomal location, plotted as a solid blue line.

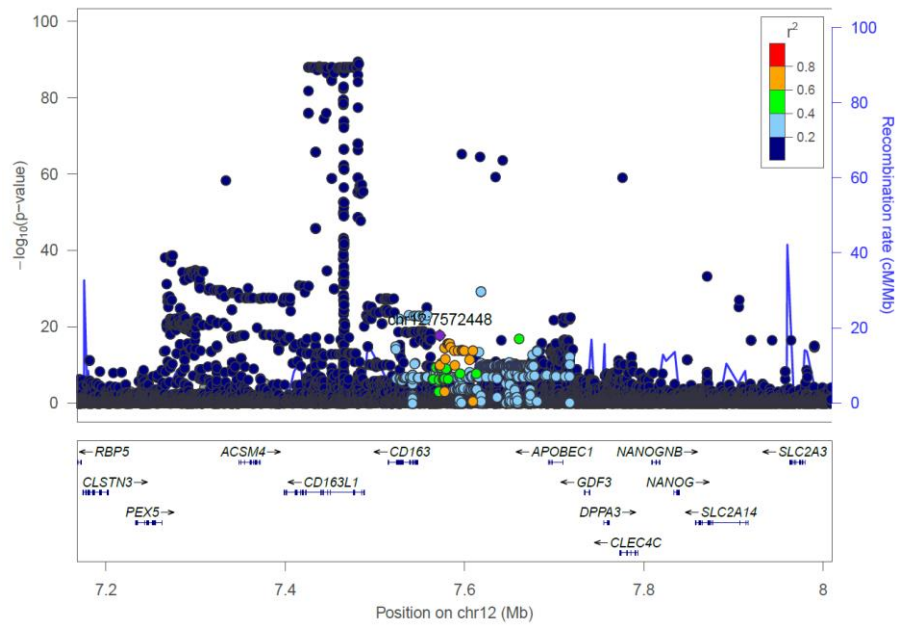

**Supplementary Figure 17:** Locus plot depicting variants, arranged by chromosomal position (x-axis) at the CD163/CD163L1 locus associating with serum LDH levels. The leading variant rs7305678 is labelled and shown in purple, other variants are coloured according to correlation ( $r^2$ ) with the leading marker (legend at top-right).  $-\log_{10}$  P-values are shown along the left y-axis and correspond to the variants depicted in the plot. The right y-axis shows calculated recombination rates at the chromosomal location, plotted as a solid blue line.

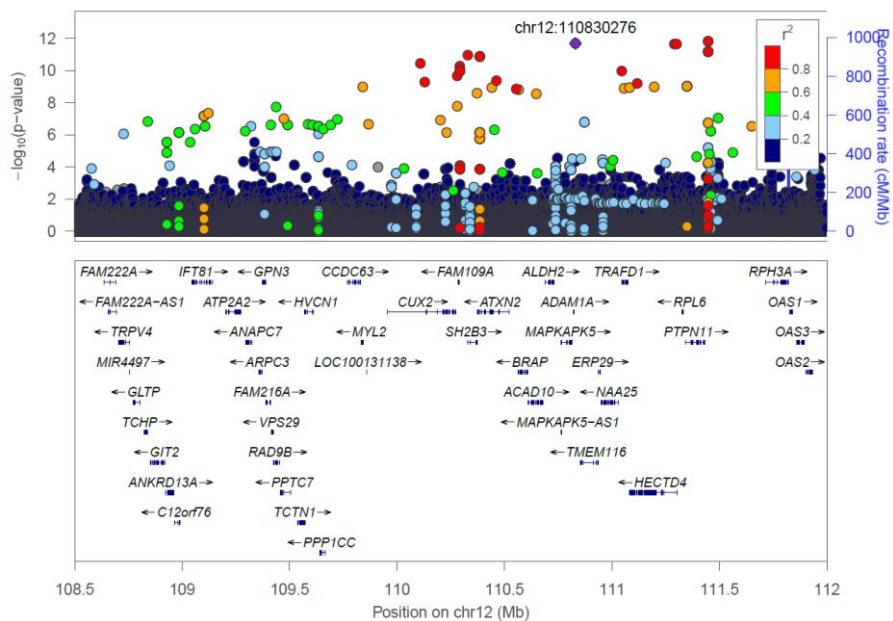

**Supplementary Figure 18:** Locus plot depicting variants, arranged by chromosomal position (x-axis) at 12q24.13 associating with serum LDH levels. The leading variant chr12:110830276:S is labelled and shown in purple, other variants are coloured according to correlation ( $r^2$ ) with the leading marker (legend at top-right).  $-\log_{10}$  P-values are shown along the left y-axis and correspond to the variants depicted in the plot. The right y-axis shows calculated recombination rates at the chromosomal location, plotted as a solid blue line.

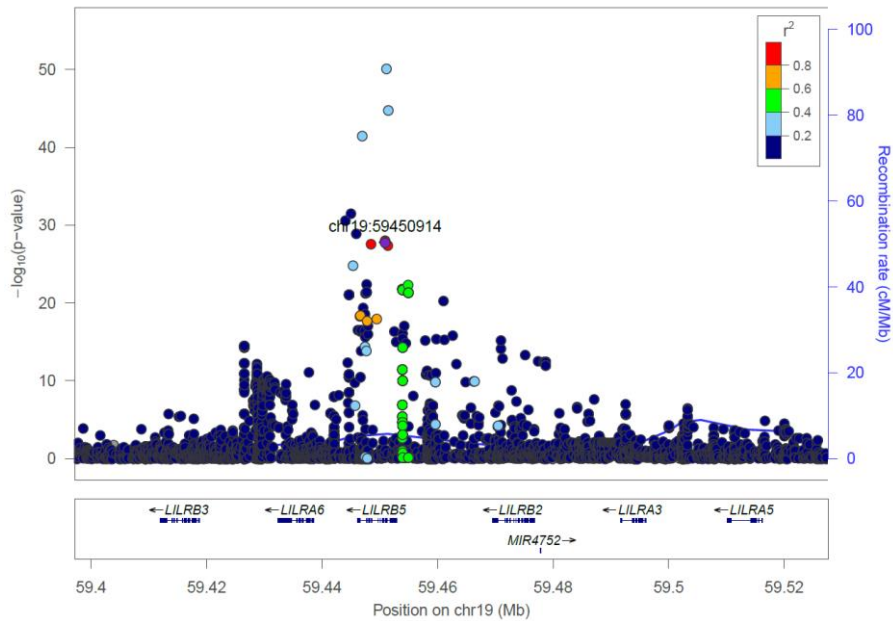

**Supplementary Figure 19:** Locus plot depicting variants, arranged by chromosomal position (x-axis) at the LILRB5 locus associating with serum LDH levels. The leading variant rs393600 is labelled and shown in purple, other variants are coloured according to correlation ( $r^2$ ) with the leading marker (legend at top-right).  $-\log_{10} P$ -values are shown along the left y-axis and correspond to the variants depicted in the plot. The right y-axis shows calculated recombination rates at the chromosomal location, plotted as a solid blue line.

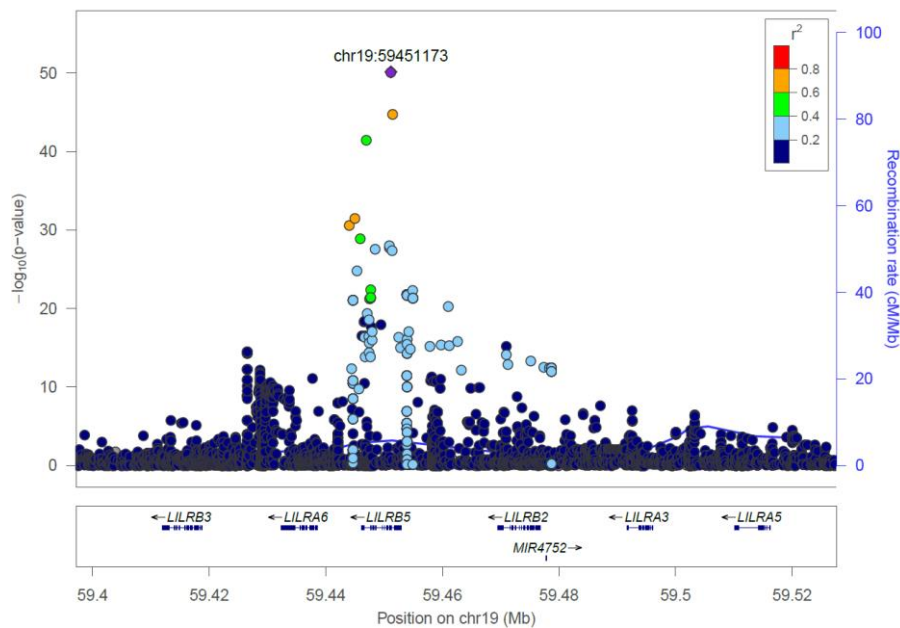

**Supplementary Figure 20:** Locus plot depicting variants, arranged by chromosomal position (x-axis) at the LILRB5 locus associating with serum LDH levels. The leading variant rs12975366 is labelled and shown in purple, other variants are coloured according to correlation ( $r^2$ ) with the leading marker (legend at top-right).  $-\log_{10} P$ -values are shown along the left y-axis and correspond to the variants depicted in the plot. The right y-axis shows calculated recombination rates at the chromosomal location, plotted as a solid blue line.

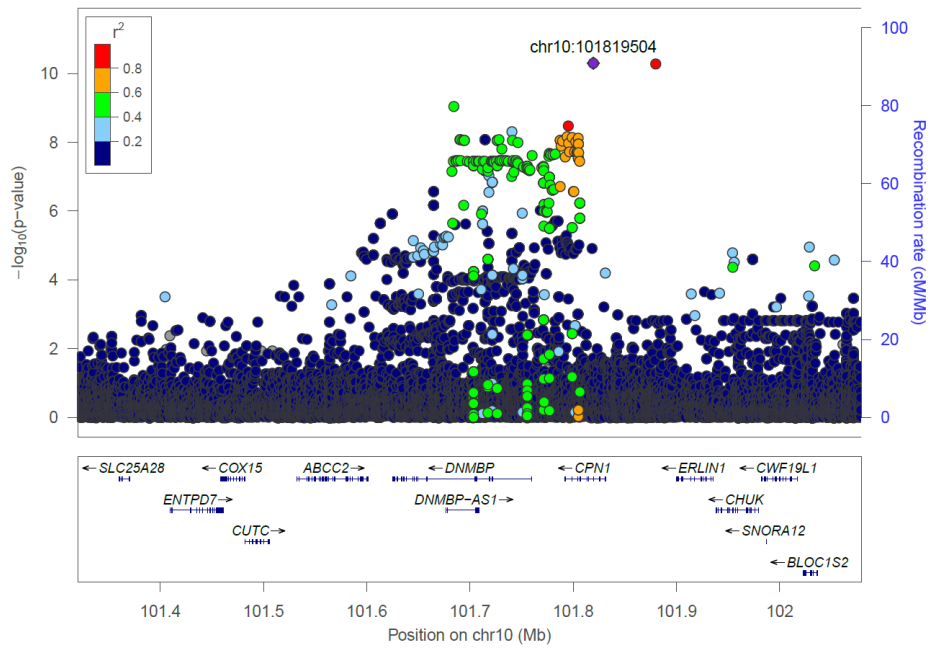

**Supplementary Figure 21:** Locus plot depicting variants, arranged by chromosomal position (x-axis) at the CPN1 locus associating with serum CK levels. The leading variant rs61751507 is labelled and shown in purple, other variants are coloured according to correlation ( $r^2$ ) with the leading marker (legend at top-right).  $-\log_{10}$  P-values are shown along the left y-axis and correspond to the variants depicted in the plot. The right y-axis shows calculated recombination rates at the chromosomal location, plotted as a solid blue line.

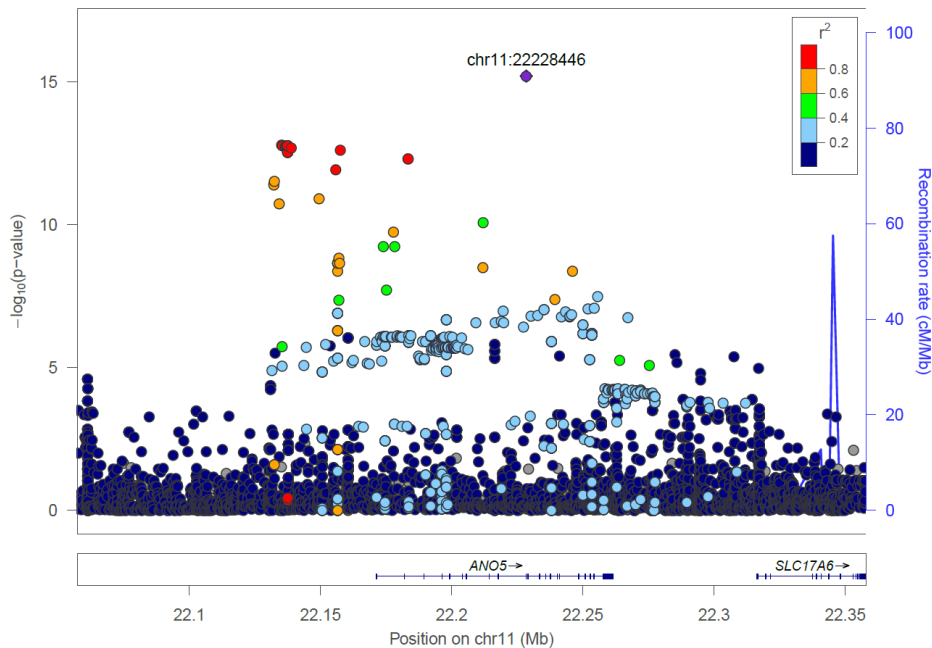

**Supplementary Figure 22:** Locus plot depicting variants, arranged by chromosomal position (x-axis) at the ANO5 locus associating with serum CK levels. The leading variant rs7481951 is labelled and shown in purple, other variants are coloured according to correlation ( $r^2$ ) with the leading marker (legend at top-right).  $-\log_{10}$  P-values are shown along the left y-axis and correspond to the variants depicted in the plot. The right y-axis shows calculated recombination rates at the chromosomal location, plotted as a solid blue line.



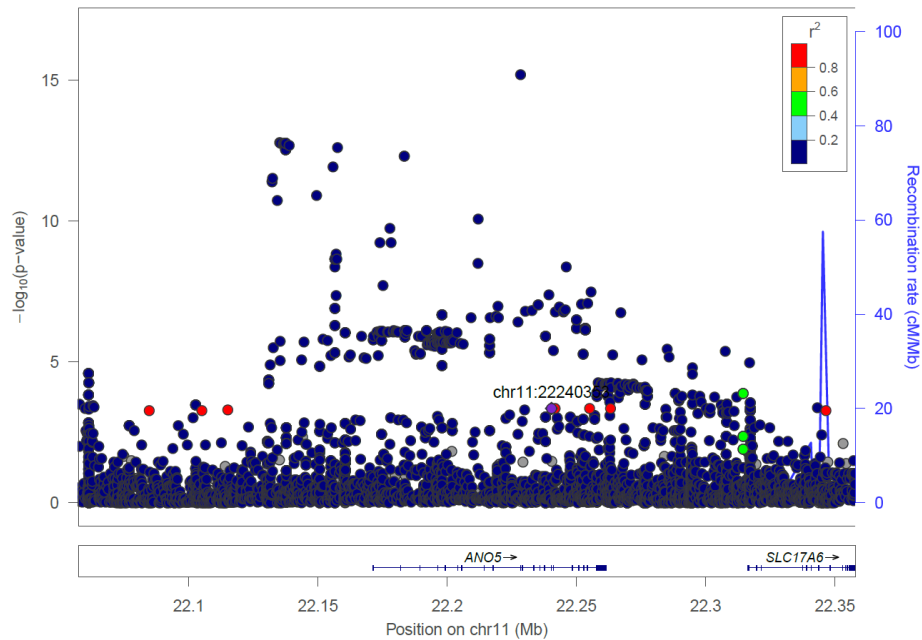

**Supplementary Figure 23:** Locus plot depicting variants, arranged by chromosomal position (x-axis) at the ANO5 locus associating with serum CK levels. The leading variant rs137854526 is labelled and shown in purple, other variants are coloured according to correlation ( $r^2$ ) with the leading marker (legend at top-right).  $-\log_{10} P$ -values are shown along the left y-axis and correspond to the variants depicted in the plot. The right y-axis shows calculated recombination rates at the chromosomal location, plotted as a solid blue line.

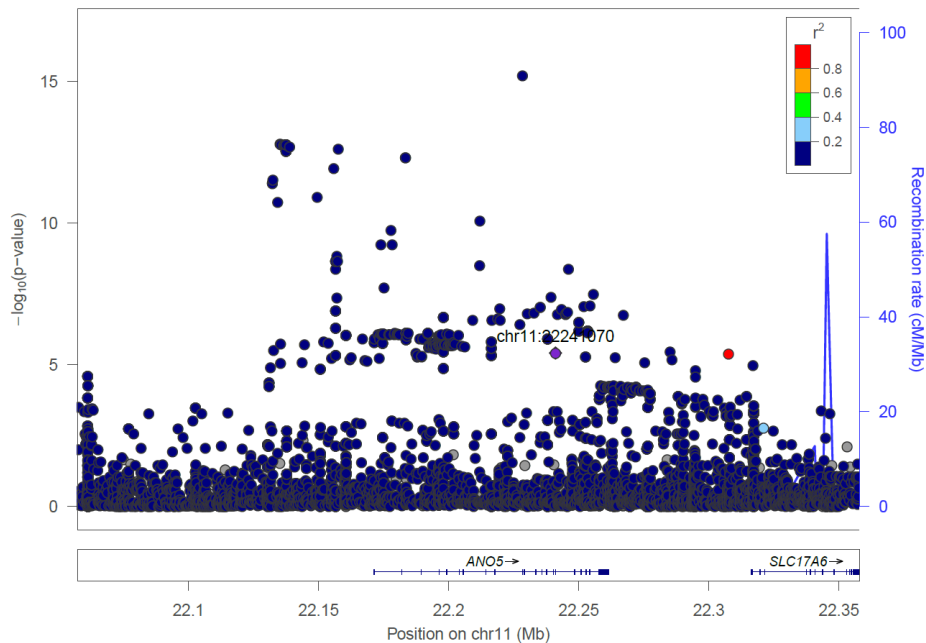

**Supplementary Figure 24:** Locus plot depicting variants, arranged by chromosomal position (x-axis) at the ANO5 locus associating with serum CK levels. The leading variant chr11:2241070:S is labelled and shown in purple, other variants are coloured according to correlation ( $r^2$ ) with the leading marker (legend at top-right).  $-\log_{10} P$ -values are shown along the left y-axis and correspond to the variants depicted in the plot. The right y-axis shows calculated recombination rates at the chromosomal location, plotted as a solid blue line.



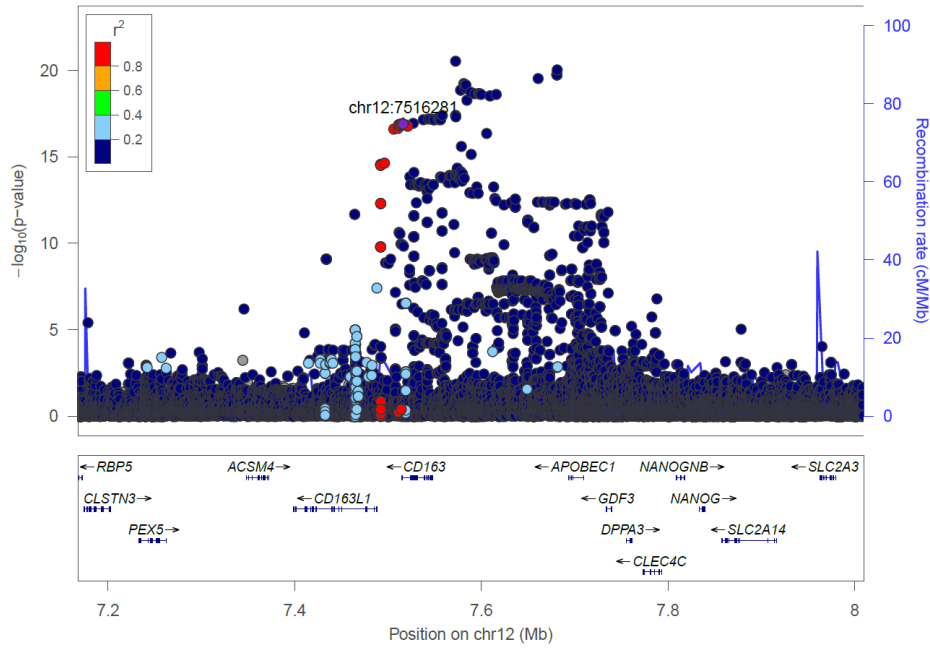

**Supplementary Figure 25:** Locus plot depicting variants, arranged by chromosomal position (x-axis) at the CD163/CD163L1 locus associating with serum CK levels. The leading variant rs117692263 is labelled and shown in purple, other variants are coloured according to correlation ( $r^2$ ) with the leading marker (legend at top-right).  $-\log_{10}$  P-values are shown along the left y-axis and correspond to the variants depicted in the plot. The right y-axis shows calculated recombination rates at the chromosomal location, plotted as a solid blue line.

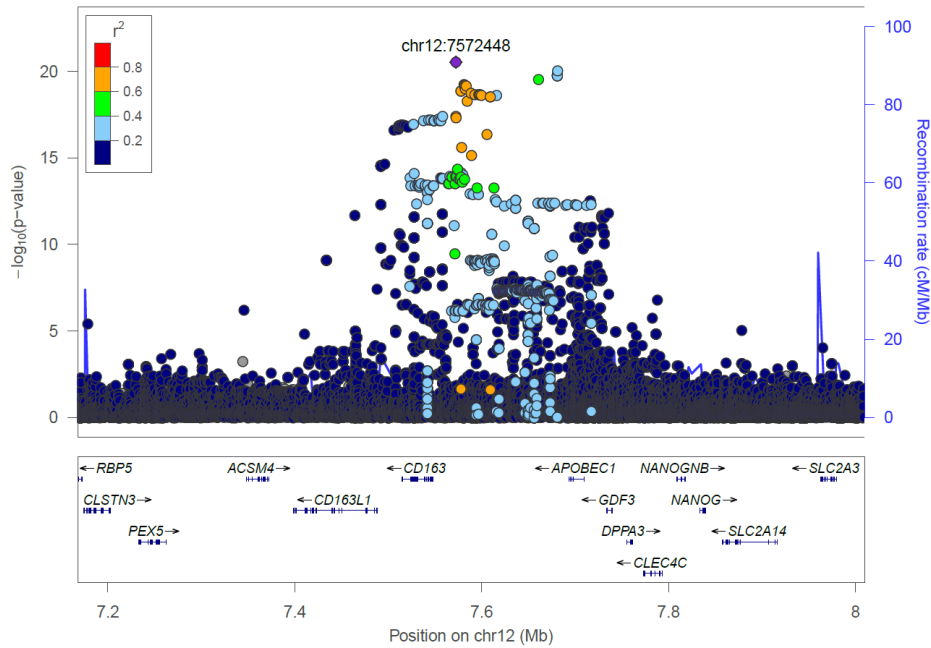

**Supplementary Figure 26:** Locus plot depicting variants, arranged by chromosomal position (x-axis) at the CD163/CD163L1 locus associating with serum CK levels. The leading variant rs7305678 is labelled and shown in purple, other variants are coloured according to correlation ( $r^2$ ) with the leading marker (legend at top-right).  $-\log_{10}$  P-values are shown along the left y-axis and correspond to the variants depicted in the plot. The right y-axis shows calculated recombination rates at the chromosomal location, plotted as a solid blue line.

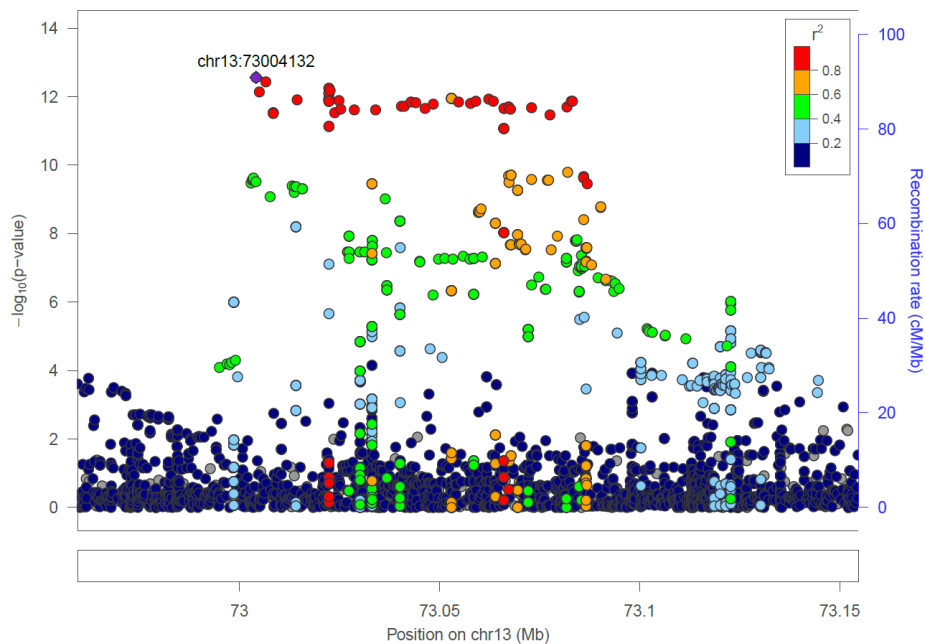

**Supplementary Figure 27:** Locus plot depicting variants, arranged by chromosomal position (x-axis) at 13q22.1 associating with serum CK levels. The leading variant rs7318906 is labelled and shown in purple, other variants are coloured according to correlation ( $r^2$ ) with the leading marker (legend at top-right).  $-\log_{10}$  P-values are shown along the left y-axis and correspond to the variants depicted in the plot. The right y-axis shows calculated recombination rates at the chromosomal location, plotted as a solid blue line.

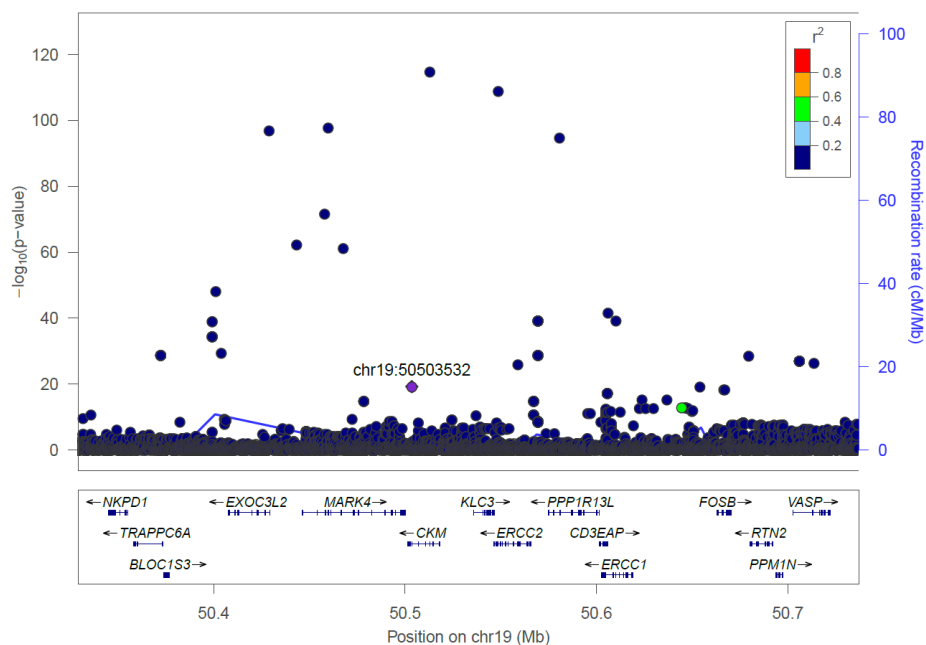

**Supplementary Figure 28:** Locus plot depicting variants, arranged by chromosomal position (x-axis) at the CKM locus associating with serum CK levels. The leading variant rs149354459 is labelled and shown in purple, other variants are coloured according to correlation ( $r^2$ ) with the leading marker (legend at top-right).  $-\log_{10}$  P-values are shown along the left y-axis and correspond to the variants depicted in the plot. The right y-axis shows calculated recombination rates at the chromosomal location, plotted as a solid blue line.

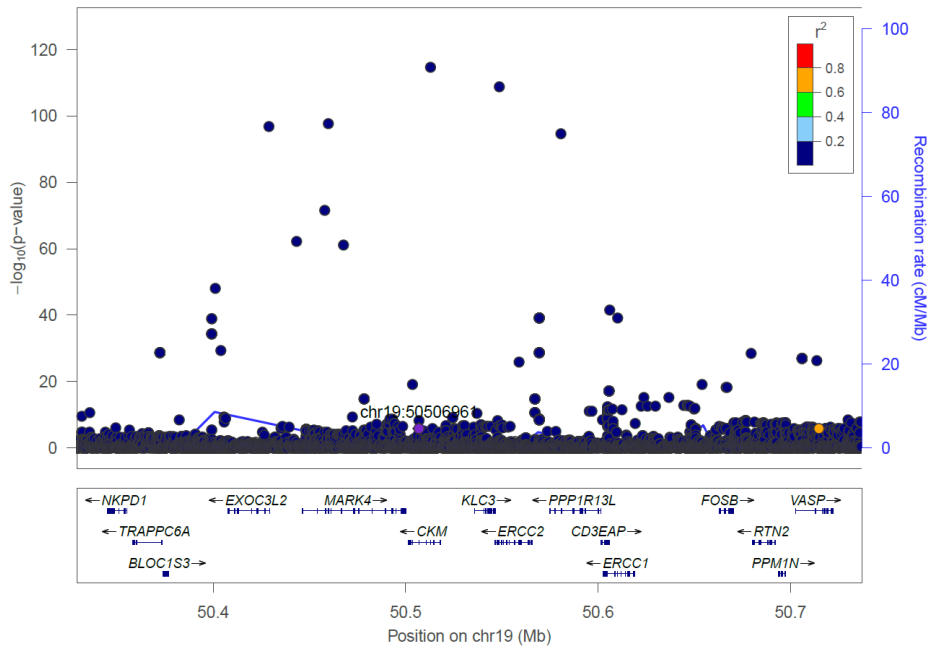

**Supplementary Figure 29:** Locus plot depicting variants, arranged by chromosomal position (x-axis) at the CKM locus associating with serum CK levels. The leading variant rs145987658 is labelled and shown in purple, other variants are coloured according to correlation ( $r^2$ ) with the leading marker (legend at top-right).  $-\log_{10} P$ -values are shown along the left y-axis and correspond to the variants depicted in the plot. The right y-axis shows calculated recombination rates at the chromosomal location, plotted as a solid blue line.

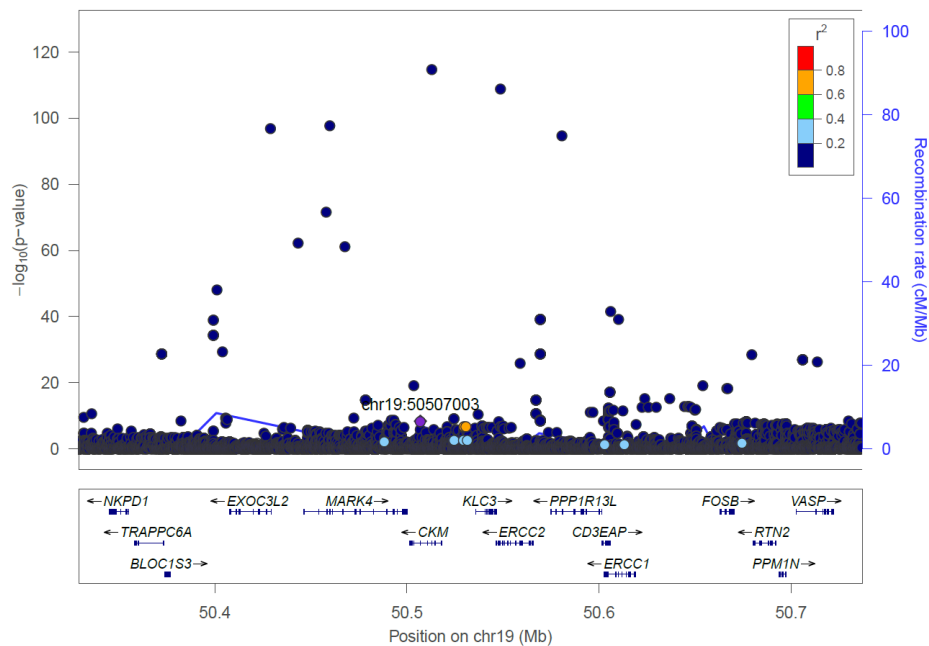

**Supplementary Figure 30:** Locus plot depicting variants, arranged by chromosomal position (x-axis) at the CKM locus associating with serum CK levels. The leading variant rs17357122 is labelled and shown in purple, other variants are coloured according to correlation ( $r^2$ ) with the leading marker (legend at top-right).  $-\log_{10} P$ -values are shown along the left y-axis and correspond to the variants depicted in the plot. The right y-axis shows calculated recombination rates at the chromosomal location, plotted as a solid blue line.

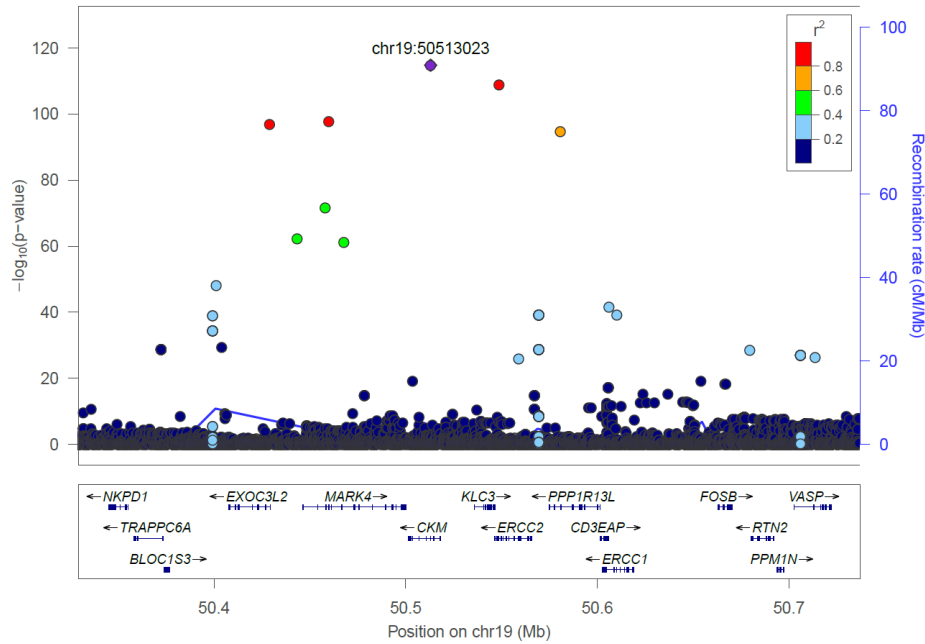

**Supplementary Figure 31:** Locus plot depicting variants, arranged by chromosomal position (x-axis) at the CKM locus associating with serum CK levels. The leading variant rs11559024 is labelled and shown in purple, other variants are coloured according to correlation ( $r^2$ ) with the leading marker (legend at top-right).  $-\log_{10}$  P-values are shown along the left y-axis and correspond to the variants depicted in the plot. The right y-axis shows calculated recombination rates at the chromosomal location, plotted as a solid blue line.

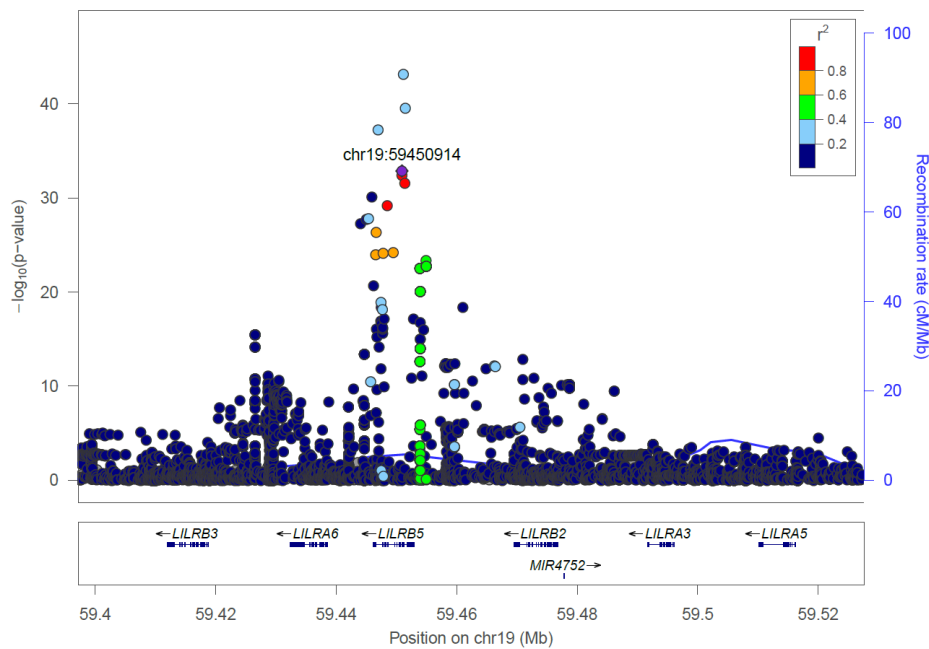

**Supplementary Figure 32:** Locus plot depicting variants, arranged by chromosomal position (x-axis) at the LILRB5 locus associating with serum CK levels. The leading variant rs393600 is labelled and shown in purple, other variants are coloured according to correlation ( $r^2$ ) with the leading marker (legend at top-right).  $-\log_{10}$  P-values are shown along the left y-axis and correspond to the variants depicted in the plot. The right y-axis shows calculated recombination rates at the chromosomal location, plotted as a solid blue line.

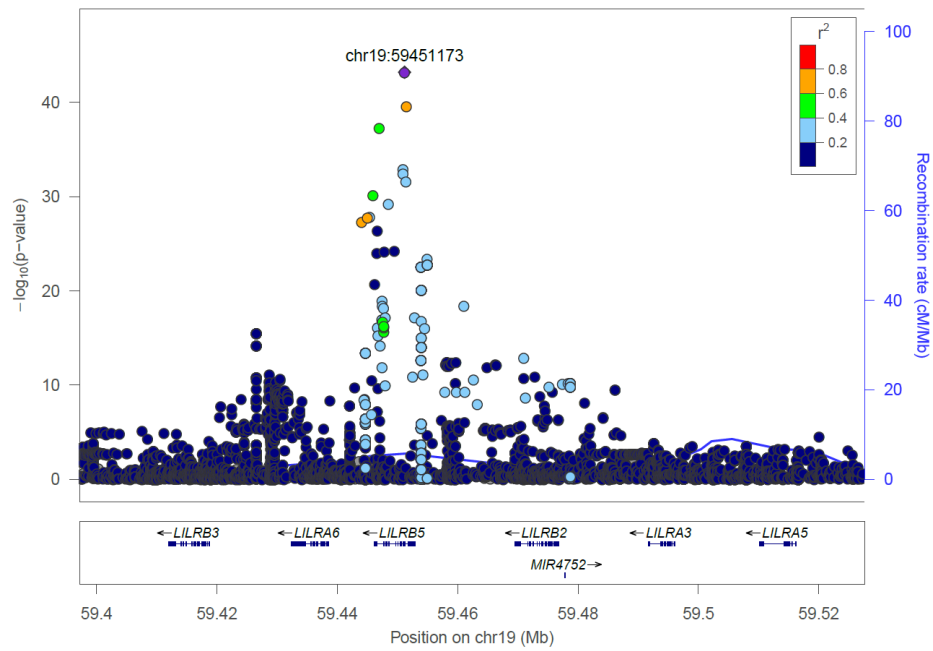

**Supplementary Figure 33:** Locus plot depicting variants, arranged by chromosomal position (x-axis) at the LILRB5 locus associating with serum CK levels. The leading variant rs12975366 is labelled and shown in purple, other variants are coloured according to correlation ( $r^2$ ) with the leading marker (legend at top-right).  $-\log_{10}$  P-values are shown along the left y-axis and correspond to the variants depicted in the plot. The right y-axis shows calculated recombination rates at the chromosomal location, plotted as a solid blue line.

Q-Q plot - Creatine Kinase

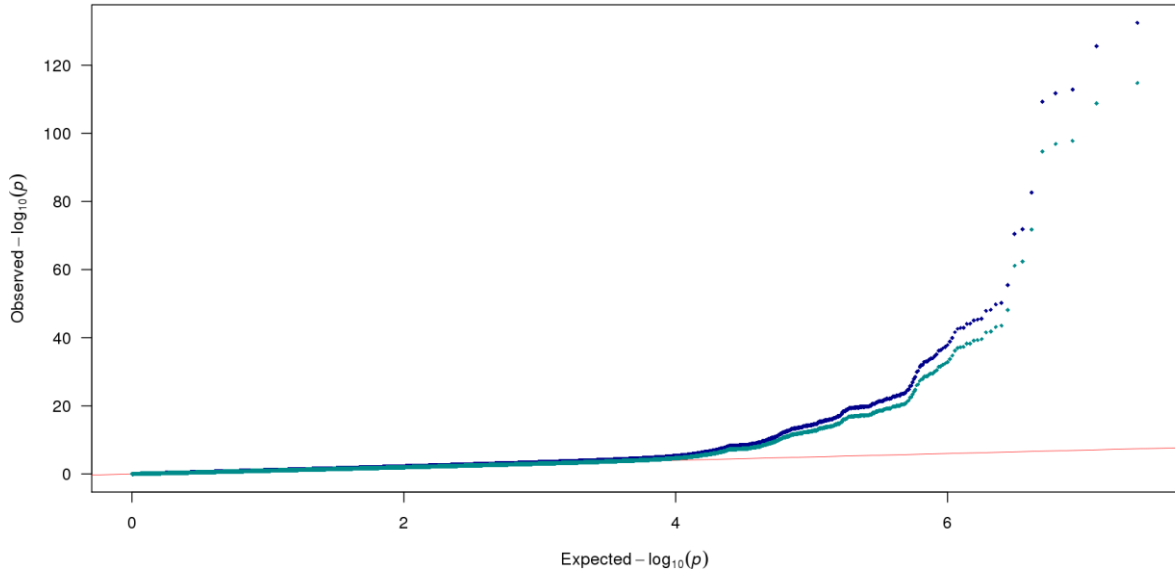

**Supplementary Figure 34:** The plot shows uncorrected (dark blue) and corrected (cyan), using the method of genomic control,  $\chi^2$  statistics from the creatine kinase GWAS.

Q-Q plot - Lactate Dehydrogenase

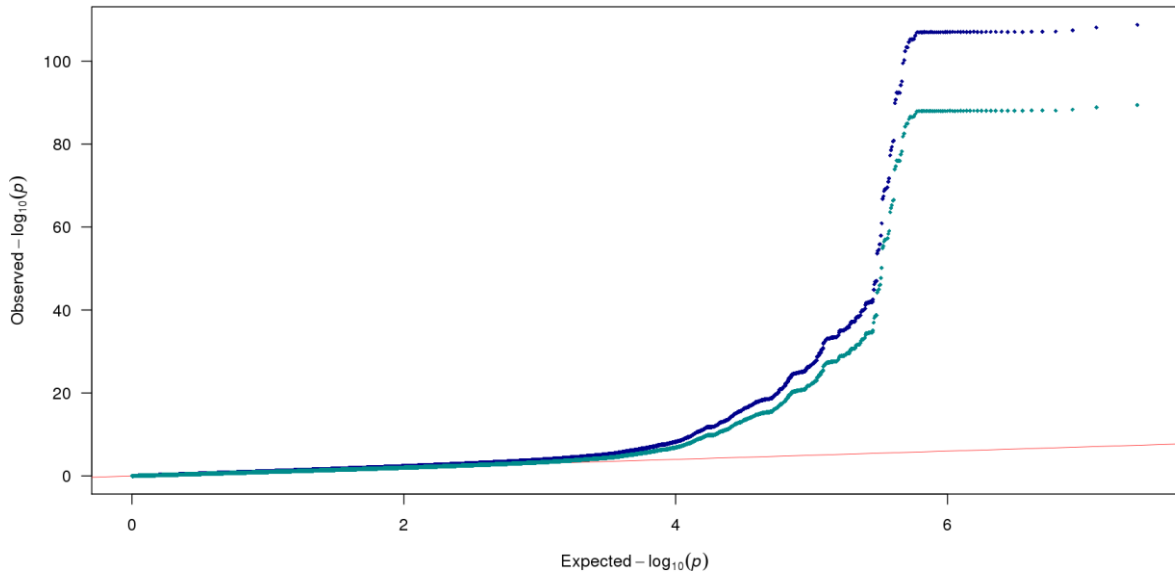

**Supplementary Figure 35:** The plot shows uncorrected (dark blue) and corrected (cyan), using the method of genomic control,  $\chi^2$  statistics from the lactate dehydrogenase GWAS



## Supplementary Tables

**Supplementary Table 1:** Sequence variant coding effects and resulting amino acid changes to their protein transcripts

| Sequence Variant   | Position (hg18) | Gene            | Coding Effect | Coding Change                                             |
|--------------------|-----------------|-----------------|---------------|-----------------------------------------------------------|
| rs333947           | chr1:110272287  | <i>CSF1</i>     | Intronic      | -                                                         |
| rs2274700          | chr1:194949570  | <i>CFH</i>      | Synonymous    | NM_000186.3:c.1419G>A(p.=)                                |
| rs150956780        | chr3:52526606   | <i>STAB1</i>    | Missense      | NP_055951.2:p.Val1522Leu                                  |
| rs17412833         | chr6:32740576   | <i>HLA-DQB1</i> | Missense      | NP_001230890.1:p.Phe119Tyr,<br>NP_002114.3:p.Phe119Tyr    |
| rs12342201         | chr9:94934785   | <i>NINJ1</i>    | Intronic      | -                                                         |
| rs61751507         | chr10:101819504 | <i>CPN1</i>     | Missense      | NP_001299.1:p.Gly178Asp                                   |
| rs116841148        | chr11:18380983  | <i>LDHA</i>     | Missense      | NP_001158886.1:p.Ala176Ser,<br>NP_001158887.1:p.Ala147Ser |
| rs7481951          | chr11:22228446  | <i>ANO5</i>     | Missense      | NP_998764.1:p.Leu322Phe                                   |
| rs137854526        | chr11:22240353  | <i>ANO5</i>     | Missense      | NP_998764.1:p.Phe578Ser                                   |
| chr11:22241070:S   | chr11:22241070  | <i>ANO5</i>     | Nonsense      | NP_998764.1:p.Cys601X                                     |
| rs2930191          | chr11:47903412  | -               | -             | -                                                         |
| chr12:7282745:0:TA | chr12:7282745   | -               | -             | -                                                         |
| rs145411783        | chr12:7440236   | <i>CD163L1</i>  | Missense      | ENSP00000393474.2:p.Arg601Leu                             |
| rs4072797          | chr12:7440276   | <i>CD163L1</i>  | Missense      | ENSP00000393474.2:p.Asp588Asn                             |
| rs117692263        | chr12:7516281   | <i>CD163</i>    | Intronic      | -                                                         |
| rs4883263          | chr12:7540751   | <i>CD163</i>    | Missense      | NP_004235.4:p.Ile342Val,<br>NP_981961.2:p.Ile342Val       |
| rs7305678          | chr12:7572448   | -               | -             | -                                                         |
| chr12:110830276:S  | chr12:110830276 | -               | -             | -                                                         |
| rs7318906          | chr13:73004132  | -               | -             | -                                                         |
| rs149354459        | chr19:50503532  | <i>CKM</i>      | Missense      | NP_001815.2:p.Arg251Pro                                   |
| rs145987658        | chr19:50506961  | <i>CKM</i>      | Missense      | NP_001815.2:p.Thr180Met                                   |
| rs17357122         | chr19:50507003  | <i>CKM</i>      | Missense      | NP_001815.2:p.Thr166Met                                   |
| rs11559024         | chr19:50513023  | <i>CKM</i>      | Missense      | NP_001815.2:p.Glu83Gly                                    |
| rs393600           | chr19:59450914  | <i>LILRB5</i>   | Intronic      | -                                                         |
| rs12975366         | chr19:59451173  | <i>LILRB5</i>   | Missense      | NP_001074912.1:p.Asp147Gly,<br>NP_006831.1:p.Asp247Gly    |

**Supplementary Table 2: Associations between CK and all reported variants when testing alternative inheritance models**

| Variant         | Chr | Position<br>(hg18) | Allele<br>(min/maj) | MAF<br>(%) | Gene <sup>††</sup> | Coding Change        | Additive               |                  | Dominant                |                  | Recessive              |                  |
|-----------------|-----|--------------------|---------------------|------------|--------------------|----------------------|------------------------|------------------|-------------------------|------------------|------------------------|------------------|
|                 |     |                    |                     |            |                    |                      | P-value                | Effect<br>[Amin] | P-value                 | Effect<br>[Amin] | P-value                | Effect<br>[Amin] |
| rs333947        | 1   | 110,272,287        | A/G                 | 14.92      | <i>CSF1</i>        | -                    | 6.8x10 <sup>-3</sup>   | -0.021           | 2.03x10 <sup>-3</sup>   | -0.027           | 0.97                   | -0.001           |
| rs2274700       | 1   | 194,949,570        | A/G                 | 38.62      | <i>CFH</i>         | -                    | 0.58                   | -0.003           | 0.71                    | -0.003           | 0.54                   | -0.006           |
| rs150956780     | 3   | 52,526,606         | C/G                 | 0.078      | <i>STAB1</i>       | Val1522Leu           | 0.60                   | 0.05             | 0.40                    | 0.132            | na                     | na               |
| rs17412833      | 6   | 32,740,576         | T/A                 | 13.76      | <i>HLA-DQB1</i>    | Phe119Tyr            | 1.5x10 <sup>-4</sup>   | 0.032            | 4.31x10 <sup>-4</sup>   | 0.033            | 5.63x10 <sup>-3</sup>  | 0.08             |
| rs12342201      | 9   | 94,934,785         | A/G                 | 49.45      | <i>NINJ1</i>       | -                    | 0.70                   | 0.002            | 0.88                    | -0.001           | 0.41                   | 0.007            |
| rs61751507      | 10  | 101,819,504        | T/C                 | 4.06       | <i>CPN1</i>        | Gly178Asp            | 5.1x10 <sup>-11</sup>  | -0.091           | 9.92x10 <sup>-12</sup>  | -0.097           | 0.47                   | -0.063           |
| rs116841148     | 11  | 18,380,983         | T/G                 | 0.65       | <i>LDHA</i>        | Ala176Ser, Ala147Ser | 0.17                   | 0.049            | 0.16                    | 0.05             | na                     | na               |
| rs7481951       | 11  | 22,228,446         | A/T                 | 37.45      | <i>ANO5</i>        | Leu322Phe            | 6.4x10 <sup>-16</sup>  | -0.047           | 7.32x10 <sup>-16</sup>  | -0.065           | 2.68x10 <sup>-7</sup>  | -0.056           |
| rs137854526     | 11  | 22,240,353         | C/T                 | 0.24       | <i>ANO5</i>        | Phe578Ser            | 4.5x10 <sup>-4</sup>   | 0.204            | 5.09x10 <sup>-4</sup>   | 0.201            | 0.11                   | 1.229            |
| chr11:22241070  | 11  | 22,241,070         | A/T                 | 0.27       | <i>ANO5</i>        | Cys601X              | 3.9x10 <sup>-6</sup>   | 0.245            | 2.71x10 <sup>-6</sup>   | 0.246            | na                     | na               |
| rs2930191       | 11  | 47,903,412         | A/G                 | 37.22      | -                  | -                    | 2.3x10 <sup>-4</sup>   | -0.021           | 1.80x10 <sup>-3</sup>   | -0.025           | 1.58x10 <sup>-3</sup>  | -0.035           |
| chr12:7282745   | 12  | 7,282,745          | TA/!TA              | 21.13      | -                  | -                    | 0.49                   | -0.005           | 0.46                    | -0.006           | 0.81                   | -0.005           |
| rs145411783     | 12  | 7,440,236          | A/C                 | 0.66       | <i>CD163L1</i>     | Arg601Leu            | 0.90                   | 0.005            | 0.81                    | 0.008            | 0.13                   | -0.706           |
| rs4072797       | 12  | 7,440,276          | T/C                 | 4.21       | <i>CD163L1</i>     | Asp588Asn            | 0.63                   | 0.007            | 0.66                    | 0.006            | 0.65                   | 0.041            |
| rs117692263     | 12  | 7,516,281          | C/T                 | 9.31       | <i>CD163</i>       | -                    | 1.2x10 <sup>-17</sup>  | 0.083            | 1.06x10 <sup>-16</sup>  | 0.085            | 3.68x10 <sup>-6</sup>  | 0.194            |
| rs4883263       | 12  | 7,540,751          | T/C                 | 3.73       | <i>CD163</i>       | Ile342Val            | 5.7x10 <sup>-5</sup>   | 0.059            | 4.15x10 <sup>-5</sup>   | 0.061            | 0.40                   | 0.085            |
| rs7305678       | 12  | 7,572,448          | T/G                 | 16.16      | -                  | -                    | 3.0x10 <sup>-21</sup>  | 0.072            | 1.14x10 <sup>-19</sup>  | 0.078            | 8.21x10 <sup>-9</sup>  | 0.137            |
| chr12:110830276 | 12  | 110,830,276        | C/T                 | 2.09       | -                  | -                    | 2.9x10 <sup>-4</sup>   | -0.071           | 1.65x10 <sup>-4</sup>   | -0.074           | 0.79                   | 0.05             |
| rs7318906       | 13  | 73,004,132         | A/G                 | 47.08      | -                  | -                    | 2.7x10 <sup>-13</sup>  | -0.041           | 7.10x10 <sup>-11</sup>  | -0.057           | 3.83x10 <sup>-9</sup>  | -0.053           |
| rs149354459     | 19  | 50,503,532         | G/C                 | 0.21       | <i>CKM</i>         | Arg251Pro            | 6.0x10 <sup>-20</sup>  | -0.55            | 1.60x10 <sup>-20</sup>  | -0.552           | na                     | na               |
| rs145987658     | 19  | 50,506,961         | A/G                 | 0.086      | <i>CKM</i>         | Thr180Met            | 8.9x10 <sup>-9</sup>   | -0.59            | 8.06x10 <sup>-7</sup>   | -0.425           | na                     | na               |
| rs17357122      | 19  | 50,507,003         | A/G                 | 0.99       | <i>CKM</i>         | Thr166Met            | 4.3x10 <sup>-9</sup>   | -0.165           | 6.00x10 <sup>-9</sup>   | -0.165           | 0.02                   | -0.553           |
| rs11559024      | 19  | 50,513,023         | C/T                 | 2.15       | <i>CKM</i>         | Glu83Gly             | 1.8x10 <sup>-115</sup> | -0.446           | 1.66x10 <sup>-117</sup> | -0.45            | 2.77x10 <sup>-7</sup>  | -1.036           |
| rs393600        | 19  | 59,450,914         | G/A                 | 25.17      | <i>LILRB5</i>      | -                    | 1.4x10 <sup>-33</sup>  | 0.079            | 2.67x10 <sup>-29</sup>  | 0.091            | 2.85x10 <sup>-18</sup> | 0.14             |
| rs12975366      | 19  | 59,451,173         | C/T                 | 41.62      | <i>LILRB5</i>      | Asp147Gly, Asp247Gly | 6.5x10 <sup>-44</sup>  | -0.08            | 2.91x10 <sup>-33</sup>  | -0.101           | 6.40x10 <sup>-32</sup> | -0.121           |

**Supplementary Table 3: Associations between LDH and all reported variants when testing alternative inheritance models**

| Variant            | Chr | Position<br>(hg18) | Allele<br>(min/maj) | MAF<br>(%) | Gene <sup>††</sup> | Coding Change        | Additive              |                  | Dominant               |                  | Recessive              |                  |
|--------------------|-----|--------------------|---------------------|------------|--------------------|----------------------|-----------------------|------------------|------------------------|------------------|------------------------|------------------|
|                    |     |                    |                     |            |                    |                      | P-value               | Effect<br>[Amin] | P-value                | Effect<br>[Amin] | P-value                | Effect<br>[Amin] |
| rs333947           | 1   | 110,272,287        | A/G                 | 14.92      | <i>CSF1</i>        | -                    | 2.8x10 <sup>-10</sup> | -0.042           | 1.21x10 <sup>-10</sup> | -0.048           | 0.01                   | -0.058           |
| rs2274700          | 1   | 194,949,570        | A/G                 | 38.62      | <i>CFH</i>         | -                    | 4.1x10 <sup>-12</sup> | -0.034           | 2.47x10 <sup>-10</sup> | -0.043           | 1.11x10 <sup>-7</sup>  | -0.048           |
| rs150956780        | 3   | 52,526,606         | C/G                 | 0.078      | <i>STAB1</i>       | Val1522Leu           | 1.3x10 <sup>-61</sup> | -1.526           | 8.13x10 <sup>-56</sup> | -2.239           | na                     | na               |
| rs17412833         | 6   | 32,740,576         | T/A                 | 13.76      | <i>HLA-DQB1</i>    | Phe119Tyr            | 1.5x10 <sup>-22</sup> | 0.07             | 4.00x10 <sup>-22</sup> | 0.077            | 2.80x10 <sup>-7</sup>  | 0.127            |
| rs12342201         | 9   | 94,934,785         | A/G                 | 49.45      | <i>NINJ1</i>       | -                    | 1.1x10 <sup>-12</sup> | -0.034           | 1.26x10 <sup>-11</sup> | -0.052           | 9.54x10 <sup>-8</sup>  | -0.04            |
| rs61751507         | 10  | 101,819,504        | T/C                 | 4.06       | <i>CPN1</i>        | Gly178Asp            | 0.34                  | 0.011            | 0.37                   | 0.011            | 0.41                   | 0.062            |
| rs116841148        | 11  | 18,380,983         | T/G                 | 0.65       | <i>LDHA</i>        | Ala176Ser, Ala147Ser | 2.9x10 <sup>-11</sup> | -0.198           | 1.05x10 <sup>-11</sup> | -0.2             | na                     | na               |
| rs7481951          | 11  | 22,228,446         | A/T                 | 37.45      | <i>ANOS</i>        | Leu322Phe            | 2.5x10 <sup>-3</sup>  | -0.015           | 1.10x10 <sup>-3</sup>  | -0.022           | 0.12                   | -0.015           |
| rs137854526        | 11  | 22,240,353         | C/T                 | 0.24       | <i>ANOS</i>        | Phe578Ser            | 0.25                  | 0.058            | 0.21                   | 0.062            | 0.29                   | -0.828           |
| chr11:22241070:S   | 11  | 22,241,070         | A/T                 | 0.27       | <i>ANOS</i>        | Cys601X              | 0.05                  | 0.09             | 0.06                   | 0.088            | na                     | na               |
| rs2930191          | 11  | 47,903,412         | A/G                 | 37.22      | -                  | -                    | 4.7x10 <sup>-13</sup> | -0.035           | 3.52x10 <sup>-10</sup> | -0.043           | 1.99x10 <sup>-9</sup>  | -0.056           |
| chr12:7282745:0:TA | 12  | 7,282,745          | TA/!TA              | 21.13      | -                  | -                    | 1.2x10 <sup>-25</sup> | -0.064           | 1.53x10 <sup>-23</sup> | -0.072           | 2.47x10 <sup>-12</sup> | -0.119           |
| rs145411783        | 12  | 7,440,236          | A/C                 | 0.66       | <i>CD163L1</i>     | Arg601Leu            | 8.7x10 <sup>-12</sup> | 0.203            | 4.98x10 <sup>-12</sup> | 0.205            | 0.14                   | 0.523            |
| rs4072797          | 12  | 7,440,276          | T/C                 | 4.21       | <i>CD163L1</i>     | Asp588Asn            | 9.9x10 <sup>-89</sup> | -0.236           | 7.88x10 <sup>-92</sup> | -0.244           | 4.19x10 <sup>-6</sup>  | -0.355           |
| rs117692263        | 12  | 7,516,281          | C/T                 | 9.31       | <i>CD163</i>       | -                    | 6.1x10 <sup>-28</sup> | 0.09             | 9.39x10 <sup>-27</sup> | 0.093            | 1.21x10 <sup>-8</sup>  | 0.202            |
| rs4883263          | 12  | 7,540,751          | T/C                 | 3.73       | <i>CD163</i>       | Ile342Val            | 1.8x10 <sup>-19</sup> | 0.114            | 1.20x10 <sup>-19</sup> | 0.116            | 4.53x10 <sup>-3</sup>  | 0.266            |
| rs7305678          | 12  | 7,572,448          | T/G                 | 16.16      | -                  | -                    | 2.0x10 <sup>-18</sup> | 0.057            | 5.07x10 <sup>-18</sup> | 0.063            | 4.27x10 <sup>-6</sup>  | 0.093            |
| chr12:110830276:S  | 12  | 110,830,276        | C/T                 | 2.09       | -                  | -                    | 2.1x10 <sup>-12</sup> | -0.119           | 8.78x10 <sup>-13</sup> | -0.121           | 0.24                   | -0.191           |
| rs7318906          | 13  | 73,004,132         | A/G                 | 47.08      | -                  | -                    | 2.9x10 <sup>-3</sup>  | -0.014           | 0.05                   | -0.015           | 1.46x10 <sup>-3</sup>  | -0.025           |
| rs149354459        | 19  | 50,503,532         | G/C                 | 0.21       | <i>CKM</i>         | Arg251Pro            | 0.54                  | 0.031            | 0.52                   | 0.033            | na                     | na               |
| rs145987658        | 19  | 50,506,961         | A/G                 | 0.086      | <i>CKM</i>         | Thr180Met            | 0.58                  | 0.047            | 0.74                   | 0.023            | 0.72                   | -0.025           |
| rs17357122         | 19  | 50,507,003         | A/G                 | 0.99       | <i>CKM</i>         | Thr166Met            | 0.45                  | 0.018            | 0.46                   | 0.018            | 0.74                   | 0.069            |
| rs11559024         | 19  | 50,513,023         | C/T                 | 2.15       | <i>CKM</i>         | Glu83Gly             | 0.16                  | 0.023            | 0.15                   | 0.024            | 0.85                   | 0.036            |
| rs393600           | 19  | 59,450,914         | G/A                 | 25.17      | <i>LILRB5</i>      | -                    | 1.6x10 <sup>-28</sup> | 0.062            | 4.51x10 <sup>-25</sup> | 0.071            | 2.08x10 <sup>-15</sup> | 0.11             |
| rs12975366         | 19  | 59,451,173         | C/T                 | 41.62      | <i>LILRB5</i>      | Asp147Gly, Asp247Gly | 7.0x10 <sup>-51</sup> | -0.074           | 5.28x10 <sup>-42</sup> | -0.098           | 1.34x10 <sup>-32</sup> | -0.105           |

**Supplementary Table 4:** Pairwise  $r^2$  and  $D'$  for sequence variants at loci harboring multiple signals. Shown are results for minor alleles, as per Table 1.

| Locus             |                    |                    | MAF  | MAF   | $r^2$                | Sign  | $D'$   |
|-------------------|--------------------|--------------------|------|-------|----------------------|-------|--------|
| ANOS              | rs7481951          | chr11:22241070:S   | 37.5 | 0.27  | 0.0016               | -1    | 1.00   |
|                   | rs7481951          | rs137854526        | 37.5 | 0.24  | 0.0014               | -1    | 1.00   |
|                   | chr11:22241070:S   | rs137854526        | 0.27 | 0.24  | $6 \times 10^{-6}$   | -1    | 1.00   |
| CD163/<br>CD163L1 | rs4072797          | rs7305678          | 4.21 | 16.2  | 0.038                | 1     | 0.41   |
|                   | rs4072797          | chr12:7282745:0:TA | 4.21 | 21.1  | 0.023                | 1     | 0.35   |
|                   | rs4072797          | rs145411783        | 4.21 | 0.66  | 0.00030              | -1    | 1.00   |
|                   | rs4072797          | rs4883263          | 4.21 | 3.73  | 0.0017               | -1    | 1.00   |
|                   | rs4072797          | rs117692263        | 4.21 | 9.31  | 0.0045               | -1    | 1.00   |
|                   | rs7305678          | chr12:7282745:0:TA | 16.2 | 21.1  | $9.1 \times 10^{-5}$ | 1     | 0.0093 |
|                   | rs7305678          | rs145411783        | 16.2 | 0.66  | 0.0013               | -1    | 1.00   |
|                   | rs7305678          | rs4883263          | 16.2 | 3.73  | 0.030                | 1     | 0.39   |
|                   | rs7305678          | rs117692263        | 16.2 | 9.31  | 0.043                | 1     | 0.28   |
|                   | chr12:7282745:0:TA | rs145411783        | 21.1 | 0.66  | 0.0019               | -1    | 0.98   |
|                   | chr12:7282745:0:TA | rs4883263          | 21.1 | 3.73  | 0.0078               | -1    | 0.82   |
|                   | chr12:7282745:0:TA | rs117692263        | 21.1 | 9.31  | $2.5 \times 10^{-5}$ | 1     | 0.0047 |
|                   | rs145411783        | rs4883263          | 0.66 | 3.73  | 0.016                | 1     | 0.32   |
|                   | rs145411783        | rs117692263        | 0.66 | 9.31  | 0.00069              | -1    | 1.00   |
| rs4883263         | rs117692263        | 3.73               | 9.31 | 0.00  | -1                   | 0.012 |        |
| CKM               | rs11559024         | rs149354459        | 2.15 | 0.21  | $4.7 \times 10^{-5}$ | -1    | 1.00   |
|                   | rs11559024         | rs17357122         | 2.15 | 0.99  | 0.00022              | -1    | 1.00   |
|                   | rs11559024         | rs145987658        | 2.15 | 0.086 | $2.2 \times 10^{-5}$ | -1    | 1.00   |
|                   | rs149354459        | rs17357122         | 0.21 | 0.99  | $2.2 \times 10^{-5}$ | -1    | 1.00   |
|                   | rs149354459        | rs145987658        | 0.21 | 0.086 | $6 \times 10^{-6}$   | -1    | 1.00   |
|                   | rs17357122         | rs145987658        | 0.99 | 0.086 | $2.7 \times 10^{-5}$ | -1    | 1.00   |
| LILRB5            | rs12975366         | rs393600           | 41.6 | 25.2  | 0.24                 | -1    | 1.00   |

**Supplementary Table 5: Variant frequencies (1000 Genomes Super Populations) and GERP Scores**

| Variant            | Position        | Allele<br>(min/maj) | MAF<br>ICE (%) | MAF<br>AFR (%) | MAF<br>AMR (%) | MAF<br>ASN (%) | MAF<br>EUR (%) | GERP<br>Score |
|--------------------|-----------------|---------------------|----------------|----------------|----------------|----------------|----------------|---------------|
| rs333947           | chr1:110272287  | A/G                 | 14.92          | 1.40           | 24.30          | 31.60          | 14.60          | 4.83          |
| rs2274700          | chr1:194949570  | A/G                 | 38.62          | 44.70          | 50.80          | 42.00          | 40.90          | -1.53         |
| rs150956780        | chr3:52526606   | C/G                 | 0.078          | -              | -              | -              | 0.40           | 4.56          |
| rs17412833         | chr6:32740576   | T/A                 | 13.76          | 29.90          | 27.90          | 21.00          | 33.10          | -5.96         |
| rs12342201         | chr9:94934785   | A/G                 | 49.45          | 82.50          | 34.00          | 18.70          | 47.20          | -2.69         |
| rs61751507         | chr10:101819504 | T/C                 | 4.06           | 0.20           | 6.10           | 2.80           | 4.10           | 4.16          |
| rs116841148        | chr11:18380983  | T/G                 | 0.65           | -              | -              | -              | 0.40           | 5.30          |
| rs7481951          | chr11:22228446  | A/T                 | 37.45          | 89.60          | 58.00          | 79.50          | 41.70          | 2.87          |
| chr11:22241070:S   | chr11:22241070  | A/T                 | 0.27           | -              | -              | -              | -              | 4.41          |
| rs137854526        | chr11:22240353  | C/T                 | 0.24           | -              | -              | -              | 0.10           | 5.69          |
| rs2930191          | chr11:47903412  | A/G                 | 37.22          | 21.60          | 48.10          | 29.70          | 38.60          | 0.18          |
| rs4072797          | chr12:7440276   | T/C                 | 4.21           | 29.70          | 9.70           | 17.00          | 3.20           | -3.40         |
| rs7305678          | chr12:7572448   | T/G                 | 16.16          | 60.00          | 22.70          | 48.10          | 13.90          | 0             |
| chr12:7282745:0:TA | chr12:7282745   | TA/!TA              | 21.13          | -              | -              | -              | -              | -0.093        |
| rs145411783        | chr12:7440236   | A/C                 | 0.66           | -              | -              | -              | 0.70           | -3.95         |
| rs4883263          | chr12:7540751   | T/C                 | 3.73           | 48.90          | 15.20          | 29.70          | 3.20           | -3.37         |
| rs117692263        | chr12:7516281   | C/T                 | 9.31           | 3.90           | 6.10           | 10.10          | 9.10           | 0.19          |
| chr12:110830276:S  | chr12:110830276 | C/T                 | 2.09           | -              | -              | -              | -              | 0.14          |
| rs7318906          | chr13:73004132  | A/G                 | 47.08          | 27.60          | 57.20          | 26.40          | 48.50          | -1.09         |
| rs11559024         | chr19:50513023  | C/T                 | 2.15           | -              | 0.80           | -              | 1.60           | -8.54         |
| rs149354459        | chr19:50503532  | G/C                 | 0.21           | -              | -              | -              | 0.10           | 5.04          |
| rs17357122         | chr19:50507003  | A/G                 | 0.99           | 0.20           | 0.60           | -              | 0.80           | 4.08          |
| rs145987658        | chr19:50506961  | A/G                 | 0.17           | -              | -              | -              | -              | 4.61          |
| rs12975366         | chr19:59451173  | C/T                 | 41.62          | 18.50          | 37.30          | 7.70           | 41.20          | 1.69          |
| rs393600           | chr19:59450914  | G/A                 | 25.17          | 14.20          | 22.90          | 4.50           | 27.70          | -2.84         |

\*Variants not reported in 1000 Genomes

Population abbreviations: ICE = Inhouse data on Icelanders; AFR = African; AMR = Ad Mixed American; ASN = East Asian; EUR = European

**Supplementary Table 6: Single marker associations with serum aspartate transaminase levels**

| Marker             | Chr   | Position    | Gene            | P value                     | Effect        |
|--------------------|-------|-------------|-----------------|-----------------------------|---------------|
| rs333947           | chr1  | 110,272,287 | <i>CSF1</i>     | <b>8.2x10<sup>-10</sup></b> | <b>-0.036</b> |
| rs2274700          | chr1  | 194,949,570 | <i>CFH</i>      | 0.02                        | -0.01         |
| rs150956780        | chr3  | 52,526,606  | <i>STAB1</i>    | 0.68                        | 0.052         |
| rs17412833         | chr6  | 32,740,576  | <i>HLA-DQB1</i> | <b>7.0x10<sup>-13</sup></b> | <b>0.044</b>  |
| rs12342201         | chr9  | 94,934,785  | <i>NINJ1</i>    | 0.11                        | -0.007        |
| rs61751507         | chr10 | 101,819,504 | <i>CPN1</i>     | 0.59                        | -0.006        |
| rs116841148        | chr11 | 18,380,983  | <i>LDHA</i>     | 0.80                        | -0.006        |
| rs7481951          | chr11 | 22,228,446  | <i>ANO5</i>     | <b>4.7x10<sup>-4</sup></b>  | <b>-0.015</b> |
| rs137854526        | chr11 | 22,240,353  | <i>ANO5</i>     | 0.36                        | 0.04          |
| chr11:22241070:S   | chr11 | 22,241,070  | <i>ANO5</i>     | 0.05                        | 0.078         |
| rs2930191          | chr11 | 47,903,412  | -               | <b>8.8x10<sup>-5</sup></b>  | <b>-0.017</b> |
| chr12:7282745:0:TA | chr12 | 7,282,745   | -               | 0.28                        | -0.006        |
| rs145411783        | chr12 | 7,440,236   | <i>CD163L1</i>  | 0.88                        | 0.004         |
| rs4072797          | chr12 | 7,440,276   | <i>CD163L1</i>  | 0.95                        | -0.001        |
| rs117692263        | chr12 | 7,516,281   | <i>CD163</i>    | 0.29                        | 0.007         |
| rs4883263          | chr12 | 7,540,751   | <i>CD163</i>    | 0.72                        | 0.004         |
| rs7305678          | chr12 | 7,572,448   | -               | 0.29                        | 0.006         |
| chr12:110830276:S  | chr12 | 110,830,276 | -               | <b>4.4x10<sup>-5</sup></b>  | <b>-0.059</b> |
| rs7318906          | chr13 | 73,004,132  | -               | 0.02                        | -0.01         |
| rs149354459        | chr19 | 50,503,532  | <i>CKM</i>      | 0.10                        | 0.074         |
| rs145987658        | chr19 | 50,506,961  | <i>CKM</i>      | 0.30                        | 0.067         |
| rs17357122         | chr19 | 50,507,003  | <i>CKM</i>      | 0.36                        | -0.019        |
| rs11559024         | chr19 | 50,513,023  | <i>CKM</i>      | 0.98                        | 0             |
| rs393600           | chr19 | 59,450,914  | <i>LILRB5</i>   | <b>4.2x10<sup>-4</sup></b>  | <b>0.017</b>  |
| rs12975366         | chr19 | 59,451,173  | <i>LILRB5</i>   | <b>6.0x10<sup>-6</sup></b>  | <b>-0.019</b> |



**Supplementary Table 7:** Phenotypes observed in homozygous carriers of sequence variants in ANO5, obtained from Icelandic hospital discharge records

|        | <b>Homozygous for<br/>Sequence Variant</b> | <b>ICD10<br/>Code</b>       | <b>Phenotype</b>                                                                                                |
|--------|--------------------------------------------|-----------------------------|-----------------------------------------------------------------------------------------------------------------|
| Case 1 | rs137854526<br>(Phe578Ser)                 | I20<br>I251<br>I259<br>I500 | Angina pectoris<br>Atherosclerotic heart disease<br>Chronic ischaemic heart disease<br>Congestive heart failure |
| Case 2 | chr11:22241070<br>(Cys601X)                | I259<br>I509                | Chronic ischaemic heart disease<br>Heart failure                                                                |

**Supplementary Table 8:** Heterogeneity of effects of identified sequence variants on serum lactate dehydrogenase (LDH) levels when statin users are assessed either during or outside of times of statin usage. Significance was determined by the number of tests performed ( $0.05/26 = 1.9 \times 10^{-3}$ ). No significant heterogeneity was observed.

| Marker             | Effect on CK (All)     |        | Effect on CK During Statin Use |        | Effect on CK Outside of Statin Use |        | Effect Heterogeneity (On Statin vs. Off Statin) |                |
|--------------------|------------------------|--------|--------------------------------|--------|------------------------------------|--------|-------------------------------------------------|----------------|
|                    | P                      | Effect | P                              | Effect | P                                  | Effect | HetP                                            | I <sup>2</sup> |
| rs333947           | $6.8 \times 10^{-3}$   | -0.021 | 0.37                           | -0.02  | 0.94                               | 0.001  | 0.42                                            | 0              |
| rs2274700          | 0.58                   | -0.003 | 0.91                           | -0.002 | 0.13                               | 0.02   | 0.31                                            | 3.3            |
| rs150956780        | 0.60                   | 0.05   | 0.5                            | -0.305 | 0.39                               | 0.388  | 0.28                                            | 15             |
| rs17412833         | $1.5 \times 10^{-4}$   | 0.032  | 0.14                           | 0.035  | 0.42                               | 0.016  | 0.54                                            | 0              |
| rs12342201         | 0.70                   | 0.002  | 0.51                           | -0.01  | 0.44                               | -0.01  | 1                                               | 0              |
| rs61751507         | $5.1 \times 10^{-11}$  | -0.091 | 0.44                           | -0.032 | 0.02                               | -0.078 | 0.39                                            | 0              |
| rs116841148        | 0.17                   | 0.049  | 0.07                           | 0.2    | 0.11                               | 0.134  | 0.64                                            | 0              |
| rs7481951          | $6.4 \times 10^{-16}$  | -0.047 | 0.0089                         | -0.043 | 0.0018                             | -0.043 | 1                                               | 0              |
| rs137854526        | $4.5 \times 10^{-4}$   | 0.204  | 0.36                           | 0.132  | 0.35                               | 0.115  | 0.93                                            | 0              |
| chr11:22241070:S   | $3.9 \times 10^{-6}$   | 0.245  | 0.26                           | 0.151  | 0.061                              | 0.199  | 0.78                                            | 0              |
| rs2930191          | $2.3 \times 10^{-4}$   | -0.021 | 0.84                           | 0.003  | 0.067                              | -0.024 | 0.17                                            | 47             |
| chr12:7282745:0:TA | 0.49                   | -0.005 | 0.84                           | -0.004 | 0.081                              | -0.029 | 0.33                                            | 0              |
| rs145411783        | 0.90                   | 0.005  | 0.85                           | -0.019 | 0.66                               | -0.036 | 0.89                                            | 0              |
| rs4072797          | 0.63                   | 0.007  | 0.37                           | -0.035 | 0.29                               | -0.034 | 0.98                                            | 0              |
| rs117692263        | $1.2 \times 10^{-17}$  | 0.083  | 0.04                           | 0.055  | 0.097                              | 0.037  | 0.6                                             | 0              |
| rs4883263          | $5.7 \times 10^{-5}$   | 0.059  | 0.57                           | 0.023  | 0.25                               | 0.04   | 0.75                                            | 0              |
| rs7305678          | $3.0 \times 10^{-21}$  | 0.072  | 0.00012                        | 0.083  | $8.1 \times 10^{-5}$               | 0.07   | 0.64                                            | 0              |
| chr12:110830276:S  | $2.9 \times 10^{-4}$   | -0.071 | 0.083                          | -0.099 | 0.00013                            | -0.177 | 0.29                                            | 11.1           |
| rs7318906          | $2.7 \times 10^{-13}$  | -0.041 | 0.00082                        | -0.053 | 0.15                               | -0.019 | 0.1                                             | 63.1           |
| rs149354459        | $6.0 \times 10^{-20}$  | -0.55  | 0.38                           | -0.151 | 0.0011                             | -0.494 | 0.14                                            | 55.2           |
| rs145987658        | $8.9 \times 10^{-9}$   | -0.59  | 0.45                           | -0.211 | 0.16                               | -0.353 | 0.7                                             | 0              |
| rs17357122         | $4.3 \times 10^{-9}$   | -0.165 | 0.0019                         | -0.242 | 0.012                              | -0.158 | 0.4                                             | 0              |
| rs11559024         | $1.8 \times 10^{-115}$ | -0.446 | $5.2 \times 10^{-18}$          | -0.486 | $1.4 \times 10^{-23}$              | -0.468 | 0.81                                            | 0              |
| rs393600           | $1.4 \times 10^{-33}$  | 0.079  | $8.6 \times 10^{-10}$          | 0.113  | $8.4 \times 10^{-11}$              | 0.099  | 0.56                                            | 0              |
| rs12975366         | $6.5 \times 10^{-44}$  | -0.08  | $2.1 \times 10^{-10}$          | -0.104 | $9.2 \times 10^{-15}$              | -0.104 | 1                                               | 0              |

**Supplementary Table 9: Heterogeneity of effects of identified sequence variants on serum lactate dehydrogenase (LDH) levels when statin users are assessed either during or outside of times of statin usage. Significance was determined by the number of tests performed ( $0.05/26 = 1.9 \times 10^{-3}$ ). No significant heterogeneity was observed.**

| Marker             | Effect on LDH (All)   |        | Effect on LDH During Statin Use |        | Effect on LDH Outside of Statin Use |        | Effect Heterogeneity (On Statin vs. Off Statin) |                |
|--------------------|-----------------------|--------|---------------------------------|--------|-------------------------------------|--------|-------------------------------------------------|----------------|
|                    | P                     | Effect | P                               | Effect | P                                   | Effect | HetP                                            | I <sup>2</sup> |
| rs333947           | $2.8 \times 10^{-10}$ | -0.042 | $5.6 \times 10^{-4}$            | -0.071 | $8.7 \times 10^{-4}$                | -0.060 | 0.69                                            | 0              |
| rs2274700          | $4.1 \times 10^{-12}$ | -0.034 | 0.0030                          | -0.045 | 0.085                               | -0.023 | 0.28                                            | 15.7           |
| rs150956780        | $1.3 \times 10^{-61}$ | -1.526 | $1.1 \times 10^{-5}$            | -2.304 | $1.3 \times 10^{-11}$               | -2.6   | 0.65                                            | 0              |
| rs17412833         | $1.5 \times 10^{-22}$ | 0.070  | 0.0028                          | 0.064  | 0.025                               | 0.043  | 0.47                                            | 0              |
| rs12342201         | $1.1 \times 10^{-12}$ | -0.034 | 0.68                            | -0.006 | 0.0048                              | -0.036 | 0.12                                            | 58.9           |
| rs61751507         | 0.34                  | 0.011  | 0.88                            | -0.006 | 0.35                                | 0.03   | 0.49                                            | 0              |
| rs116841148        | $2.9 \times 10^{-11}$ | -0.198 | 0.045                           | -0.204 | 0.090                               | -0.144 | 0.65                                            | 0              |
| rs7481951          | $2.5 \times 10^{-3}$  | -0.015 | 0.18                            | -0.021 | 0.065                               | -0.025 | 0.85                                            | 0              |
| rs137854526        | 0.25                  | 0.058  | 0.13                            | -0.213 | 0.43                                | -0.10  | 0.55                                            | 0              |
| chr11:22241070:S   | 0.05                  | 0.09   | 0.96                            | 0.006  | 0.14                                | 0.16   | 0.35                                            | 0              |
| rs2930191          | $4.7 \times 10^{-13}$ | -0.035 | 0.091                           | -0.025 | 0.0037                              | -0.038 | 0.51                                            | 0              |
| chr12:7282745:0:TA | $1.2 \times 10^{-25}$ | -0.064 | $2.4 \times 10^{-4}$            | -0.069 | $1.3 \times 10^{-6}$                | -0.08  | 0.66                                            | 0              |
| rs145411783        | $8.7 \times 10^{-12}$ | 0.203  | 0.43                            | 0.069  | 0.0099                              | 0.197  | 0.27                                            | 17.8           |
| rs4072797          | $9.9 \times 10^{-89}$ | -0.236 | $7.0 \times 10^{-9}$            | -0.206 | $2.2 \times 10^{-18}$               | -0.276 | 0.14                                            | 53.9           |
| rs117692263        | $6.1 \times 10^{-28}$ | 0.090  | 0.0041                          | 0.072  | 0.022                               | 0.051  | 0.53                                            | 0              |
| rs4883263          | $1.8 \times 10^{-19}$ | 0.114  | 0.026                           | 0.086  | 0.0026                              | 0.102  | 0.76                                            | 0              |
| rs7305678          | $2.0 \times 10^{-18}$ | 0.057  | 0.0076                          | 0.053  | 0.042                               | 0.036  | 0.52                                            | 0              |
| chr12:110830276:S  | $2.1 \times 10^{-12}$ | -0.119 | 0.0015                          | -0.17  | 0.0016                              | -0.148 | 0.76                                            | 0              |
| rs7318906          | $2.9 \times 10^{-3}$  | -0.014 | 0.45                            | -0.011 | 0.93                                | 0.001  | 0.51                                            | 0              |
| rs149354459        | 0.54                  | 0.031  | 0.47                            | 0.104  | 0.40                                | 0.116  | 0.95                                            | 0              |
| rs145987658        | 0.58                  | 0.047  | 0.66                            | 0.102  | 0.94                                | -0.019 | 0.72                                            | 0              |
| rs17357122         | 0.45                  | 0.018  | 0.22                            | -0.091 | 0.24                                | -0.071 | 0.84                                            | 0              |
| rs11559024         | 0.16                  | 0.023  | 0.99                            | -0.001 | 0.098                               | 0.076  | 0.29                                            | 9.9            |
| rs393600           | $1.6 \times 10^{-28}$ | 0.062  | $1.7 \times 10^{-6}$            | 0.082  | $7.6 \times 10^{-7}$                | 0.075  | 0.76                                            | 0              |
| rs12975366         | $7.0 \times 10^{-51}$ | -0.074 | $1.5 \times 10^{-5}$            | -0.066 | $2.1 \times 10^{-8}$                | -0.075 | 0.66                                            | 0              |

**Supplementary Table 10:** Associations between known variant rs4363657 in *SLCO1B1* and all tested phenotypes

| <b>Pval</b> | <b>Effect</b> | <b>Phenotype</b>                   |
|-------------|---------------|------------------------------------|
| 0.26        | 0.008         | Creatine Kinase                    |
| 0.35        | 0.019         | Creatine Kinase (On Statin)        |
| 0.06        | 0.033         | Creatine Kinase (Off Statin)       |
| 0.91        | 0.001         | Lactate Dehydrogenase              |
| 0.45        | -0.015        | Lactate Dehydrogenase (On Statin)  |
| 0.87        | -0.003        | Lactate Dehydrogenase (Off Statin) |

**Supplementary Table 11:** *Correlations between genotypes of WGS Icelanders and their imputed genotypes using the 1000 Genomes imputation set (Phase I) for 20 markers present in both sets reported in this manuscript*

| Marker      | Position        | Alleles<br>[min/maj] | r <sup>2</sup> (Imputed vs. Real) |
|-------------|-----------------|----------------------|-----------------------------------|
| rs333947    | chr1:110272287  | [G/A]                | 0.91                              |
| rs2274700   | chr1:194949570  | [G/A]                | 0.99                              |
| rs150956780 | chr3:52526606   | [G/C]                | 0                                 |
| rs17412833  | chr6:32740576   | [A/T]                | NA*                               |
| rs12342201  | chr9:94934785   | [G/A]                | 0.96                              |
| rs61751507  | chr10:101819504 | [C/T]                | 0.94                              |
| rs116841148 | chr11:18380983  | [G/T]                | 0.51                              |
| rs137854526 | chr11:22240353  | [T/C]                | NA*                               |
| rs2930191   | chr11:47903412  | [G/A]                | 0.95                              |
| rs145411783 | chr12:7440236   | [C/A]                | 0.97                              |
| rs4072797   | chr12:7440276   | [C/T]                | 0.99                              |
| rs117692263 | chr12:7516281   | [T/C]                | 0.96                              |
| rs4883263   | chr12:7540751   | [T/C]                | 0.83                              |
| rs7305678   | chr12:7572448   | [T/G]                | 0.99                              |
| rs7318906   | chr13:73004132  | [G/A]                | 1                                 |
| rs149354459 | chr19:50503532  | [C/G]                | NA*                               |
| rs17357122  | chr19:50507003  | [G/A]                | 0.8                               |
| rs11559024  | chr19:50513023  | [T/C]                | 0.95                              |
| rs393600    | chr19:59450914  | [G/A]                | 0.85                              |
| rs12975366  | chr19:59451173  | [T/C]                | 0.63                              |

\* NA = markers not present in 1000G Phase I but present in 1000G Phase 3 data.

**Supplementary Table 12:** *Correlates of reported markers, based on Icelandic data, that are themselves not present in the 1000 genomes reference panel, and the degrees of correlation between their directly typed and imputed genotypes in the 1000 Genomes reference panel. For five markers reported in this manuscript.*

| Reported Variant   | Correlate         | Alleles [min/maj] | MAF (%) | r <sup>2</sup> | D'   | r <sup>2</sup> (Imputed vs. Real) |
|--------------------|-------------------|-------------------|---------|----------------|------|-----------------------------------|
| chr11:22228446:S   | chr11:22132253:S  | [G/T]             | 44.6    | 0.63           | 1    | 0.83                              |
|                    | chr11:22132254:S  | [A/T]             | 44.6    | 0.63           | 1    | 0.83                              |
|                    | chr11:22132480:I  | [C/CCAAA]         | 44.6    | 0.63           | 1    | NA                                |
|                    | chr11:22134340:S  | [C/T]             | 43.5    | 0.67           | 1    | 0.89                              |
|                    | chr11:22135253:S  | [T/C]             | 38.9    | 0.82           | 1    | 0.98                              |
|                    | chr11:22135551:S  | [A/G]             | 38.9    | 0.82           | 1    | 0.98                              |
|                    | chr11:22136569:S  | [T/C]             | 38.9    | 0.82           | 1    | 0.98                              |
|                    | chr11:22136883:S  | [A/G]             | 38.9    | 0.82           | 1    | 0.98                              |
|                    | chr11:22138940:S  | [T/C]             | 38.9    | 0.82           | 1    | 0.99                              |
|                    | chr11:22155841:S  | [A/G]             | 40.2    | 0.82           | 1    | 0.94                              |
|                    | chr11:22157339:S  | [G/A]             | 43.9    | 0.70           | 1    | 0.96                              |
|                    | chr11:22157583:S  | [T/G]             | 39.6    | 0.84           | 1    | 0.96                              |
|                    | chr11:22177816:S  | [C/A]             | 41.4    | 0.80           | 1    | 0.98                              |
|                    | chr11:22183424:S  | [A/G]             | 41.0    | 0.81           | 1    | 0.92                              |
|                    | chr11:22183460:S  | [T/C]             | 41.0    | 0.81           | 1    | 0.92                              |
|                    | chr11:22212062:S  | [G/A]             | 27.1    | 0.62           | 1    | 0.93                              |
| chr11:22239363:S   | [G/A]             | 48.4              | 0.61    | 1              | 0.86 |                                   |
| chr11:22246097:S   | [G/A]             | 48.9              | 0.63    |                | 0.87 |                                   |
| chr12:7282745:0:TA | chr12:7267513:S   | [C/T]             | 20.7    | 0.72           | 1    | 1                                 |
|                    | chr12:7274848:S   | [T/C]             | 20.7    | 0.73           | 1    | NA                                |
|                    | chr12:7286581:S   | [A/G]             | 22.0    | 0.68           | 1    | 1                                 |
|                    | chr12:7288524:S   | [G/A]             | 21.7    | 0.67           | 1    | 0.99                              |
|                    | chr12:7300178:S   | [G/T]             | 21.7    | 0.67           | 1    | 0.72                              |
|                    | chr12:7301165:S   | [A/C]             | 21.8    | 0.67           | 1    | 0.99                              |
| chr12:110830276:S  | chr12:110373191:S | [C/T]             | 2.8     | 0.75           | -1   | 0.9                               |
|                    | chr12:110385162:S | [C/T]             | 3.2     | 0.79           | -1   | NA                                |
|                    | chr12:110441793:S | [T/C]             | 2.8     | 0.76           | -1   | 0.87                              |
|                    | chr12:110462920:S | [T/C]             | 2.3     | 0.90           | -1   | NA                                |
|                    | chr12:110555332:S | [A/G]             | 2.7     | 0.76           | -1   | 0.7                               |
|                    | chr12:110566902:S | [T/C]             | 2.8     | 0.76           | -1   | 0.87                              |
|                    | chr12:110648651:S | [G/A]             | 2.8     | 0.75           | -1   | 0.9                               |
|                    | chr12:111045555:S | [A/G]             | 2.6     | 0.80           | -1   | 0.89                              |
|                    | chr12:111057324:S | [A/G]             | 2.8     | 0.75           | -1   | 0.89                              |
|                    | chr12:111117509:S | [T/C]             | 2.7     | 0.76           | -1   | 0.87                              |
|                    | chr12:111197154:S | [G/A]             | 2.8     | 0.75           | -1   | 0.89                              |
|                    | chr12:111290544:S | [A/G]             | 2.1     | 1.00           | -1   | 0                                 |

|                  |                   |       |      |      |    |      |
|------------------|-------------------|-------|------|------|----|------|
|                  | chr12:111301047:S | [A/G] | 2.1  | 1.00 | -1 | NA   |
| chr19:50506961:S | chr19:50714764:S  | [A/G] | 0.1  | 0.70 | -1 | 0    |
| chr19:59451173:S | chr19:59444029:S  | [G/C] | 41.2 | 0.66 | -1 | 0.72 |
|                  | chr19:59445014:S  | [C/T] | 41.3 | 0.67 | -1 | 0.71 |
|                  | chr19:59451478:S  | [C/T] | 44.2 | 0.71 | -1 | 0.66 |

**Supplementary Table 13:** *Characteristics of CK and LDH measurements among the Icelandic laboratories.*

|                            | RAM            | FSA            | LUH            |
|----------------------------|----------------|----------------|----------------|
| Number of CK Measurements  | 25,152         | 7,867          | 219,569        |
| Unique Individuals         | 14,961         | 3,966          | 49,467         |
| % Females                  | 59.8           | 48.3           | 47.5           |
| Median CK                  | 96.0           | 98.0           | 90.0           |
| (Quantiles: 25%, 75%)      | (68.0, 142.0)  | (65.0, 155.0)  | (49.0, 219.0)  |
| Geometric Mean             | 101.0          | 109.4          | 114.7          |
| <hr/>                      |                |                |                |
| Number of LDH Measurements | 24,378         | 20,103         | 445,744        |
| Unique Individuals         | 4,677          | 7,346          | 95,372         |
| % Females                  | 47.4           | 55.0           | 54.4           |
| Median LDH                 | 190.0          | 185.0          | 195.0          |
| (Quantiles: 25%, 75%)      | (169.0, 215.0) | (160.0, 220.0) | (164.5, 244.0) |
| Geometric Mean             | 192.6          | 196.0          | 212.9          |

RAM: The Icelandic Medical Center (Laeknasetrid) Laboratory in Mjodd.

LUH: Landspítali - The National University Hospital of Iceland.

FSA: Akureyri Hospital



## Supplementary Note 1

### Statistical analysis

#### *Long range phasing*

Long range phasing of all chip-genotyped individuals was performed with methods described previously<sup>1-5</sup>. In brief, phasing is achieved using an iterative algorithm which phases a single proband at a time given the available phasing information about everyone else that shares a long haplotype identically by state with the proband. Given the large fraction of the Icelandic population that has been chip-typed, accurate long range phasing is available genome-wide for all chip-typed Icelanders.

#### *Genotype imputation*

We imputed the SNPs identified and genotyped through sequencing into all Icelanders who had been phased with long range phasing using the same model as used by IMPUTE<sup>6</sup>. The genotype data from sequencing can be ambiguous due to low sequencing coverage. In order to phase the sequencing genotypes, an iterative algorithm was applied for each SNP with alleles 0 and 1. We let  $H$  be the long range phased haplotypes of the sequenced individuals and applied the following algorithm:

1. For each haplotype  $h$  in  $H$ , use the Hidden Markov Model of IMPUTE to calculate for every other  $k$  in  $H$ , the likelihood, denoted  $\gamma_{h,k}$ , of  $h$  having the same ancestral source as  $k$  at the SNP. For every  $h$  in  $H$ , initialize the parameter  $\vartheta_h$ , which specifies how likely the one allele of the SNP is to occur on the background of  $h$  from the genotype likelihoods obtained from sequencing. The genotype likelihood  $L_g$  is the probability of the observed sequencing data at the SNP for a given individual assuming  $g$  is the true genotype at the SNP. If  $L_0$ ,  $L_1$  and  $L_2$  are the likelihoods of the genotypes 0, 1 and 2 in the individual that carries  $h$ , then set

$$\theta_h = \frac{L_2 + \frac{1}{2}L_1}{L_2 + L_1 + L_0}.$$

2. For every pair of haplotypes  $h$  and  $k$  in  $H$  that are carried by the same individual, use the other haplotypes in  $H$  to predict the genotype of the SNP on the backgrounds of  $h$  and  $k$ :  $\tau_h = \sum_{l \in H \setminus \{h\}} \gamma_{h,l} \theta_l$  and  $\tau_k = \sum_{l \in H \setminus \{k\}} \gamma_{k,l} \theta_l$ . Combining these predictions with the genotype likelihoods from sequencing gives un-normalized updated phased genotype probabilities:  $P_{00} = (1 - \tau_h)(1 - \tau_k)L_0$ ,  $P_{10} = \tau_h(1 - \tau_k)\frac{1}{2}L_1$ ,  $P_{01} = (1 - \tau_h)\tau_k\frac{1}{2}L_1$  and  $P_{11} = \tau_h\tau_kL_2$ .
3. Now use these values to update  $\vartheta_h$  and  $\vartheta_k$  to  $\theta_h = \frac{P_{10} + P_{11}}{P_{00} + P_{01} + P_{10} + P_{11}}$  and  $\theta_k = \frac{P_{01} + P_{11}}{P_{00} + P_{01} + P_{10} + P_{11}}$ .
4. Repeat step 3 when the maximum difference between iterations is greater than a convergence threshold  $\varepsilon$ . We used  $\varepsilon = 10^{-7}$ .

Given the long range phased haplotypes and  $\vartheta$ , the allele of the SNP on a new haplotype  $h$  not in  $H$ , is imputed as  $\sum_{l \in H} \gamma_{h,l} \theta_l$ .

The above algorithm can easily be extended to handle simple family structures such as parent-offspring pairs and triads by letting the  $P$  distribution run over all founder haplotypes in the family structure. The algorithm also extends trivially to the X-chromosome. If source genotype data are only ambiguous in phase, such as chip genotype data, then the algorithm is still applied, but all but one of the  $L$ s will be 0. In some instances, the reference set was intentionally enriched for carriers of the minor allele of a rare SNP in order to improve imputation accuracy. In this case, expected allele counts will be biased toward the minor allele of the SNP. Call the enrichment of the minor allele  $E$  and let  $\vartheta'$  be the expected minor allele count calculated from the naïve imputation method, and let  $\vartheta$  be the unbiased expected allele count, then  $\theta' = \frac{E\theta}{1 - \theta + E\theta}$  and hence  $\theta = \frac{\vartheta'}{E + (1 - E)\theta'}$ .

This adjustment was applied to all imputations based on enriched imputations sets. We note that if  $\vartheta'$  is 0 or 1, then  $\vartheta$  will also be 0 or 1, respectively.

### *Genotype Imputation of Unchipped Relatives*

In addition to imputing sequence variants from the whole genome sequencing effort into chip genotyped individuals, we also performed a second imputation step where genotypes were imputed into relatives of chip genotyped individuals. These genotypes were created on the fly and were not stored. The inputs into the second imputation step are the fully phased (in particular every allele has been assigned a parent of origin) imputed and chip type genotypes of the available chip typed individuals. The algorithm used to perform the second imputation step consists of:

1. For each ungenotyped individual (the proband), find all chip genotyped individuals within two meioses of the individual. The six possible types of two meiosis relatives of the proband are (ignoring more complicated relationships due to pedigree loops): Parents, full and half siblings, grandparents, children and grandchildren. If all pedigree paths from the proband to a genotyped relative go through other genotyped relatives, then that relative is excluded. E.g. if a parent of the proband is genotyped, then the proband's grandparents through that parent are excluded. If the number of meiosis in the pedigree around the proband exceeds a threshold (we used 12), then relatives are removed from the pedigree until the number of meiosis falls below 12, in order to reduce computational complexity.
2. At every point in the genome, calculate the probability for each genotyped relative sharing with the proband based on the autosomal SNPs used for phasing. A multipoint algorithm based on the hidden Markov model Lander-Green multipoint linkage algorithm using fast Fourier transforms is used to calculate these sharing probabilities. First single point sharing probabilities are calculated by dividing the genome into 0.5cM bins and using the haplotypes over these bins as alleles. Haplotypes that are the same, except at most at a single SNP, are

treated as identical. When the haplotypes in the pedigree are incompatible over a bin, then a uniform probability distribution was used for that bin. The most common causes for such incompatibilities are recombinations in member belonging to the pedigree, phasing errors and genotyping errors. Note that since the input genotypes are fully phased, the single point information is substantially more informative than for unphased genotyped, in particular one haplotype of the parent of a genotyped child is always known. The single point distributions are then convolved using the multipoint algorithm to obtain multipoint sharing probabilities at the center of each bin. Genetic distances were obtained from the most recent version of the deCODE genetic map<sup>2</sup>.

3. Based on the sharing probabilities at the center of each bin, all the SNPs from the whole genome sequencing are imputed into the proband. To impute the genotype of the paternal allele of a SNP located at  $x$ , flanked by bins with centers at  $x_{left}$  and  $x_{right}$ . Starting with the left bin, going through all possible sharing patterns  $v$ , let  $I_v$  be the set of haplotypes of genotyped individuals that share identically by descent within the pedigree with the proband's paternal haplotype given the sharing pattern  $v$  and  $P(v)$  be the probability of  $v$  at the left bin – this is the output from step 2 above – and let  $e_i$  be the expected allele count of the SNP for haplotype  $i$ . Then  $e_v = \frac{\sum_{i \in I_v} e_i}{\sum_{i \in I_v} 1}$  is the expected allele count of the paternal haplotype of the proband given  $v$  and an overall estimate of the allele count given the sharing distribution at the left bin is obtained from  $e_{left} = \sum_v P(v) e_v$ . If  $I_v$  is empty then no relative shares with the proband's paternal haplotype given  $v$  and thus there is no information about the allele count. We therefore store the probability that some genotyped relative shared the proband's paternal haplotype,  $O_{left} = \sum_{v, I_v \neq \emptyset} P(v)$  and an expected allele count, conditional on the proband's paternal haplotype being shared by at least one genotyped relative:  $c_{left} = \frac{\sum_{v, I_v \neq \emptyset} P(v) e_v}{\sum_{v, I_v \neq \emptyset} P(v)}$ . In the same way calculate  $O_{right}$  and  $c_{right}$ . Linear interpolation is then used to get an estimates at the SNP from the two flanking bins:

$$O = O_{left} + \frac{x - x_{left}}{x_{right} - x_{left}} (O_{right} - O_{left}),$$

$$c = c_{left} + \frac{x - x_{left}}{x_{right} - x_{left}} (c_{right} - c_{left}).$$

If  $\theta$  is an estimate of the population frequency of the SNP then  $Oc + (1 - O)\theta$  is an estimate of the allele count for the proband's paternal haplotype. Similarly, an expected allele count can be obtained for the proband's maternal haplotype.

*Genotype imputation information.* The informativeness of genotype imputation was estimated by the ratio of the variance of imputed expected allele counts and the variance of the actual allele counts:

$$\frac{Var(E(\theta|chip\ data))}{Var(\theta)},$$

where  $\theta \in \{0, 1\}$  is the allele count.  $Var(E(\theta|chip\ data))$  was estimated by the observed variance of the imputed expected counts and  $Var(\theta)$  was estimated by  $p(1 - p)$ , where  $p$  is the allele frequency. For the present study, when imputed genotypes are used, the information value for all SNPs is between 0.92 and 0.99.

#### *Quantitative trait association testing*

A generalized form of linear regression was used to test for association of CK and LDH levels with SNPs. Let  $y$  be the vector of quantitative measurements, and let  $g$  be the vector of expected allele counts for the SNP being tested. We assume the quantitative measurements follow a normal distribution with a mean that depends linearly on the expected allele at the SNP and a variance covariance matrix proportional to the kinship matrix:

$$y \sim \mathcal{N}(\alpha + \beta g, 2\sigma^2 \Phi),$$

where

$$\Phi_{ij} = \begin{cases} \frac{1}{2}, & i = j \\ 2k_{ij}, & i \neq j \end{cases}$$

is the kinship matrix as estimated from the Icelandic genealogical database. It is not computationally feasible to use this full model and we therefore split the individuals with in silico genotypes and CK/LDH measurements into smaller clusters. Here we chose to restrict the cluster size to at most 300 individuals.

The maximum likelihood estimates for the parameters  $\alpha$ ,  $\beta$ , and  $\sigma^2$  involve inverting the kinship matrix. If there are  $n$  individuals in the cluster, then this inversion requires  $O(n^3)$  calculations, but since these calculations only need to be performed once the computational cost of doing a genome-wide association scan will only be  $O(n^2)$  calculations; the cost of calculating the maximum likelihood estimates if the kinship matrix has already been inverted.

## Supplementary References

1. Kong, A. et al. Detection of sharing by descent, long-range phasing and haplotype imputation. *Nat Genet* **40**, 1068-75 (2008).
2. Kong, A. et al. Fine-scale recombination rate differences between sexes, populations and individuals. *Nature* **467**, 1099-103 (2010).
3. Sulem, P. et al. Identification of low-frequency variants associated with gout and serum uric acid levels. *Nat Genet* **43**, 1127-30 (2011).
4. Rafnar, T. et al. Mutations in BRIP1 confer high risk of ovarian cancer. *Nat Genet* **43**, 1104-7 (2011).
5. Stacey, S.N. et al. A germline variant in the TP53 polyadenylation signal confers cancer susceptibility. *Nat Genet* **43**, 1098-103 (2011).
6. Marchini, J., Howie, B., Myers, S., McVean, G. & Donnelly, P. A new multipoint method for genome-wide association studies by imputation of genotypes. *Nat Genet* **39**, 906-13 (2007).
